# Supplementary material for: Fabrication and characterization of thin-film field-effect transistors with alkyl-phenyl[n]phenacenes (n = 4–6)
Source: Royal Society of Chemistry journal article supplement (doi:10.1039/d2tc03383f), 2022-01-01
Supplement: d2tc03383f1.pdf [file d2tc03383f1.pdf]

## Supplementary Information

### Fabrication and characterization of thin-film field-effect transistors with alkyl-phenyl[n]phenacenes (n = 4 – 6)

Yanting Zhang,<sup>a</sup> Ritsuko Eguchi,<sup>a</sup> Hideki Okamoto,<sup>b</sup> Kenta Goto,<sup>c</sup> Fumito Tani,<sup>c</sup> Minoru Yamaji,<sup>d</sup> Hidenori Goto,<sup>a</sup> Yoshihiro Kubozono<sup>a\*</sup>

- a) Research Institute for Interdisciplinary Science, Okayama University, Okayama 700-8530, Japan
- b) Department of Chemistry, Graduate School of Natural Science and Technology, Okayama University, Okayama 700-7850, Japan
- c) Institute for Materials Chemistry and Engineering, Kyushu University, Fukuoka 819-0395, Japan
- d) Division of Molecular Science, Graduate School of Science and Engineering, Gunma University, Ota 373-0057 Japan

### Contents

- (1) Detailed synthetic procedures and physical data for new compounds synthesized in this study.
- (2) NMR spectra of new compounds synthesized in this study (Figure S1-1~24).
- (3) UV-Vis absorption and fluorescence spectra of PhCn'-[n]phenacenes in solution (in *o*-dichlorobenzene) and solid phases (Figure S2).
- (4) AFM images of thin films of thin films of PhC10-CHR, PhC14-CHR, PhC10-PIC, PhC14-PIC, PhC10-FUL and PhC14-FUL.
- (5) Transfer and output characteristics of PhC10-CHR, PhC14-CHR, PhC10-FUL and PhC14-FUL thin-film FETs with SiO<sub>2</sub> gate dielectric (Figures S4 and S5).

(6) Transfer and output characteristics of PhC10-CHR, PhC14-CHR, PhC10-FUL and PhC14-FUL thin-film FETs with ZrO<sub>2</sub> gate dielectric (Figures S6 and S7).

## (1) Experimental details and physical data for samples synthesized in this study.

### Methyl 6-trifluoromethanesulfonyloxy-1-naphthoate **2**

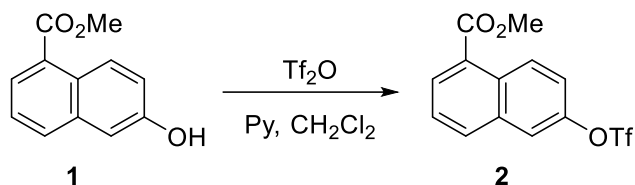

To a solution of methyl 6-hydroxy-1-naphthoate **1** (5.0 g, 24.7 mmol) in CH<sub>2</sub>Cl<sub>2</sub> (250 ml) was dropwise added Tf<sub>2</sub>O (10.5 g, 37.1 mmol) at  $-80 - -78^{\circ}\text{C}$ . The solution was stirred at  $-80 - -75^{\circ}\text{C}$  for 3 h. The reaction was quenched with saturated NH<sub>4</sub>Cl (50 ml). The organic layer was washed successively with water, 1 M HCl, NaHCO<sub>3</sub> and dried (Na<sub>2</sub>SO<sub>4</sub>). The solvent was removed under reduced pressure and the residue was chromatographed on silica gel (toluene) to afford triflate **2** (8.07 g, 98%) as pale brown plates, mp  $66-66.5^{\circ}\text{C}$  (Lit.<sup>S1</sup>  $58-60^{\circ}\text{C}$ ). <sup>1</sup>H NMR (600 MHz, CDCl<sub>3</sub>)  $\delta_{\text{H}}$  9.10 (d, 1H,  $J = 9.5$  Hz), 8.28 (dd, 1H,  $J = 7.3, 1.2$  Hz), 8.05 (d, 1H,  $J = 8.3$  Hz), 7.80 (d, 1H,  $J = 2.6$  Hz), 7.62 (dd, 1H,  $J = 8.3, 7.3$  Hz), 7.49 (dd, 1H,  $J = 9.5, 2.6$  Hz), 4.02 (s, 3H). <sup>13</sup>C NMR (151 MHz, CDCl<sub>3</sub>)  $\delta_{\text{C}}$  167.4, 147.3, 134.2, 133.4, 131.6, 130.5, 129.30, 127.31, 126.6, 122.1\*, 121.3, 119.9\*, 119.8, 117.8\*, 115.7\*, 52.6. Asterisked signals are assigned to CF<sub>3</sub> ( $J_{\text{CF}} = 320$  Hz).

[S1] Y. Lv, M. Li, S. Cao, L. Tong, T. Peng, L. Wei, H. Xie, J. Ding, and W. Duan, *Med. Chem. Commun.*, 2015, **6**, 1375.

### Methyl 6-(1-decynyl)-1-naphthoate **3a**

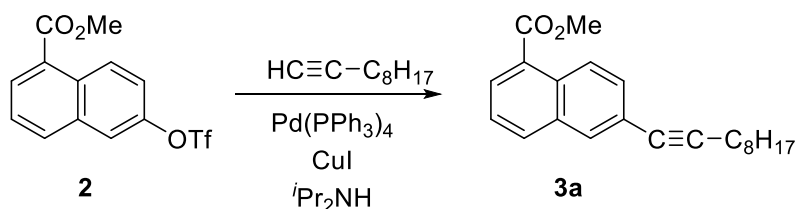

A mixture of triflate **2** (1.34 g, 4.0 mmol), 1-decyne (660 mg, 4.8 mmol), Pd(PPh<sub>3</sub>)<sub>2</sub>Cl<sub>2</sub> (140 mg, 0.20 mmol), CuI (20 mg, 0.11 mmol) in *i*Pr<sub>2</sub>NH (25 ml) was deaerated three evacuation-refilling with Ar cycles and refluxed for 22 h. The solvent was removed under reduced pressure. The residue was passed through a short silica-gel column (toluene). The crude material was

repeatedly separated by preparative liquid chromatography (silica-gel, hexane/AcOEt = 10/1) to afford compound **3a** (1.22 g, 94.5%) as pale brown waxy solid.

**<sup>1</sup>H NMR** (600 MHz, CDCl<sub>3</sub>) δ<sub>H</sub> 8.34 (d, 1H, *J* = 8.8 Hz), 8.16 (dd, 1H, *J* = 7.3, 1.1 Hz), 7.95–7.92 (2H, two signals overlap), 7.58 (dd, 1H, *J* = 8.8, 1.7 Hz), 7.48 (t, 1H, *J* = 7.8 Hz), 4.00 (s, 3H), 2.46 (t, 2H, *J* = 7.0 Hz), 1.64 (quin, 2H, *J* = 7.2 Hz), 1.48 (quin, 2H, *J* = 7.2 Hz), 1.38–1.23 (m, 8H), 0.89 (t, 3H, *J* = 7.0 Hz).

**<sup>13</sup>C NMR** (151 MHz, CDCl<sub>3</sub>) δ<sub>C</sub> 167.97, 133.67, 133.11, 131.52, 130.75, 130.64, 130.48, 127.05, 125.88, 125.18, 122.09, 91.88, 80.52, 52.36, 32.00, 29.36, 29.29, 29.12, 28.87, 22.82, 19.66, 14.28.

**HRMS** (FAB) *m/z* Calcd. for C<sub>22</sub>H<sub>26</sub>O<sub>2</sub>: 322.1933. Found. 322.1933 (M<sup>+</sup>).

### Methyl 6-(1-tetradecynyl)-1-naphthoate **3b**

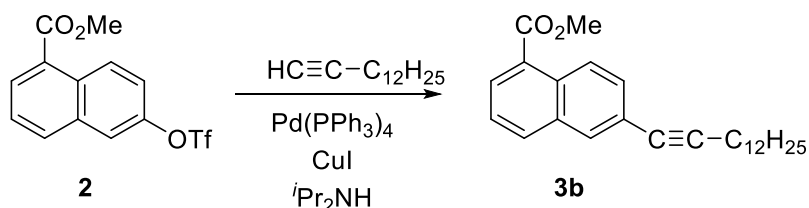

A mixture of triflate **2** (2.00 g, 6.00 mmol), 1-tetradecyne (1.80 mL, 7.32 mmol), Pd(PPh<sub>3</sub>)<sub>2</sub>Cl<sub>2</sub> (440 mg, 0.692 mmol) and CuI (133 mg, 0.70 mmol), in diisopropylamine (30 mL) was refluxed under argon for 16 h. The mixture was concentrated and the residue was separated by activated alumina column chromatography using hexane : CH<sub>2</sub>Cl<sub>2</sub> (10:1) as an eluent to give compound **3b** as a dark brown oil (1.31 g, 3.46 mmol **A**) along with a fraction containing the desired compound **3b**. The latter was further separated by alumina column chromatography using hexane as an eluent to give additional compound **3b** (499 mg, 1.32 mmol, **B**) as yellow oil. The total yield of compound **3b** (**A+B**) was 80% (1.81 g, 4.79 mmol). Yellow oil, **<sup>1</sup>H NMR** (600 MHz, CDCl<sub>3</sub>) δ<sub>H</sub> 8.84 (d, *J* = 9.0 Hz, 1H), 8.16 (d, *J* = 1.3 Hz, 1H), 7.94-7.93 (m, 2H), 7.58 (d, *J* = 1.8 Hz, 1H), 7.48 (dd, *J* = 8.2, 9.0 Hz, 1H), 4.01 (s, 3H), 2.46 (t, *J* = 7.2 Hz, 2H), 1.65 (quin, *J* = 7.2, Hz, 2H), 1.48 (quin, *J* = 7.0, Hz, 2H), 1.33-1.27 (m, 20H), 0.88 (t, *J* = 7.0 Hz, 3H). **<sup>13</sup>C NMR** (151 MHz, CDCl<sub>3</sub>) δ<sub>C</sub> 168.0, 133.7, 133.1, 131.5, 130.8 130.6, 130.5, 127.1, 125.9, 125.2, 122.1, 91.9, 80.6, 52.3, 32.1, 29.82, 29.80, 29.79, 29.7, 29.5, 29.3, 29.1, 28.9, 22.8, 19.7, 14.3. **HRMS** (FAB) Calcd. for C<sub>26</sub>H<sub>34</sub>O<sub>2</sub>: 378.2559. Found: *m/z* 378.2554.

### Methyl 6-decyl-1-naphthoate **4a**

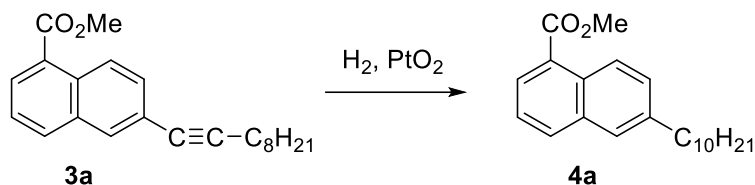

A mixture of compound **3a** (1.22 g, 3.78 mmol) and PtO<sub>2</sub> (42 mg, 0.19 mmol, 5 mol%) in AcOEt (30 ml) was vigorously stirred at r.t. under a H<sub>2</sub> atmosphere for 16 h. The mixture was filtered through a short silica-gel pad and the filtrate was concentrated under reduced pressure to afford compound **4a** (1.22 g, 99%) as an off-white waxy solid.

<sup>1</sup>H NMR (600 MHz, CDCl<sub>3</sub>) δ<sub>H</sub> 8.23 (d, 1H, *J* = 8.8 Hz), 8.12 (dd, 1H, *J* = 7.2 Hz, 1.2 Hz), 7.95 (d, 1H, *J* = 8.1 Hz), 7.65 (brd, 1H, *J* = 1.1 Hz), 7.47 (dd, 1H, *J* = 8.8, 1.8 Hz), 7.46 (dd, 1H, *J* = 8.1, 7.3 Hz), 4.00 (s, 3H), 2.78 (t, 2H, *J* = 7.5 Hz), 1.69 (quin, 2H, *J* = 7.5 Hz), 1.40–1.20 (m, 14H), 0.88 (t, 3H, *J* = 7.0 Hz).

<sup>13</sup>C NMR (151 MHz, CDCl<sub>3</sub>) δ<sub>C</sub> 168.29, 140.99, 134.23, 133.06, 129.89, 129.54, 129.51, 127.03, 126.94, 125.75, 124.58, 52.25, 35.97, 32.039, 31.35, 29.76, 29.74, 29.67, 29.47, 29.46, 22.83, 14.28.

HRMS (FAB) *m/z* Calcd. for C<sub>22</sub>H<sub>30</sub>O<sub>2</sub>: 326.2246. Found. 326.2236 (M<sup>+</sup>)

### Methyl 6-tetradecyl-1-naphthoate **4b**

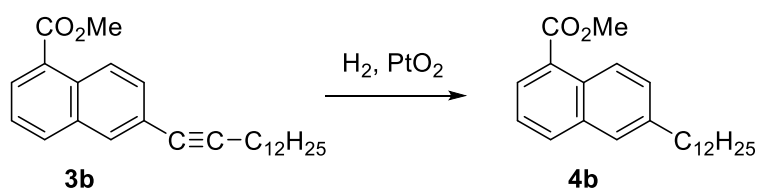

A mixture of compound **3b** (1.07 g, 2.81 mmol), PtO<sub>2</sub> (60.5 mg, 0.266 mmol) was stirred under hydrogen atmosphere at r.t. for 24 h. The resulting mixture was chromatographed on silica gel using hexane : AcOEt (9:1) to remove the platinum catalyst to afford **4b** (942 mg, 2.46 mmol, 87.7%). Colorless crystals, m.p. 48.0-48.5 °C. <sup>1</sup>H NMR (300 MHz, CDCl<sub>3</sub>) δ<sub>H</sub> 8.94 (d, *J* = 9.0 Hz, 1H), 8.16 (d, *J* = 1.2 Hz, 1H), 7.93 (d, *J* = 8.3 Hz, 1H), 7.65 (s, 1H), 7.49 - 7.45 (m, 2H), 4.01 (s, 3H), 2.46 (t, *J* = 7.1 Hz, 2H), 1.65 (quin, *J* = 7.1, 2H), 1.48 (quin, *J* = 7.0, 2H) 1.46-1.27 (m, 20H), 0.88 (t, *J* = 7.0, Hz, 3H). <sup>13</sup>C NMR (150 MHz, CDCl<sub>3</sub>) δ<sub>C</sub> 168.2, 141.0, 134.3,

133.0, 129.9, 129.5, 127.0, 126.9, 125.8, 124.5, 52.2, 36.0, 32.1, 31.3, 29.84, 29.82, 29.81\*, 29.80, 29.74, 29.67, 29.51, 29.47, 22.8, 14.3. IR  $\nu_{max}$  3399 (C=O), 3025 (C-H), 3007 (C-H), 2953 (C-H), 2912 (C-H), 2847 (C-H), 1731 (C=O), 1455, 1028 (C-O), 835 (C-H), 758 (C-H)  $\text{cm}^{-1}$ . Anal. Calcd. for C, 81.62; H, 10.01. Found C, 81.65; H, 9.93.

### Methyl 6-phenyl-1-naphthoate 4b

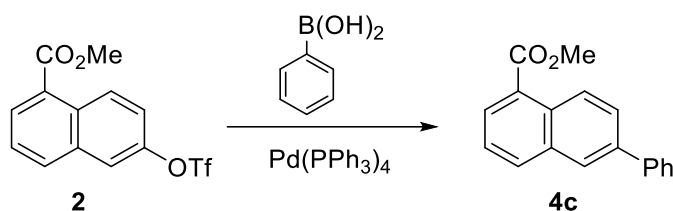

A mixture of methyl triflate **2** (1.00 g, 3.0 mmol), phenylboronic acid (549 mg, 4.5 mmol), Pd(PPh<sub>3</sub>)<sub>4</sub> (173 mg, 0.15 mmol), and K<sub>2</sub>CO<sub>3</sub> (1.24 g, 9.0 mmol) in a mixture of toluene (28 ml), EtOH (3 ml), and H<sub>2</sub>O (3 ml) was degassed by three freeze-pump cycles. The resulting mixture was heated at 90°C for 4.5 h under Ar. The organic phase was filtered through a silica-gel pad and concentrated. The residue was chromatographed on silica-gel (toluene) to afford methyl compound **4c** (744 mg, 94%) as colorless solid.

Mp, 77-78.5°C (lit.<sup>S2</sup> 61.3-62.9°C)

<sup>1</sup>H NMR (CDCl<sub>3</sub>, 600 MHz)  $\delta_{\text{H}}$  9.00 (d, 1H,  $J = 8.9$  Hz), 8.20 (dd, 1H,  $J = 7.2, 1.2$  Hz), 8.10-8.07 (m, 2H), 7.90 (dd, 1H,  $J = 8.8, 2.0$  Hz), 7.76-7.70 (m, 2H), 7.55-7.49 (m, 3H), 7.41 (m, 1H), 4.03 (s, 3H).

<sup>13</sup>C NMR (CDCl<sub>3</sub>, 151 MHz)  $\delta_{\text{C}}$  168.13, 140.60, 138.89, 134.32, 133.80, 130.67, 130.37, 129.07, 127.77, 127.56, 127.53, 127.05, 126.56, 126.33, 125.10, 52.35.

[S2] P. Álvarez-Bercedo and R. Martín, *J. Am. Chem. Soc.* 2010, **132**, 17352.

### 1-(bromomethyl)-6-decyl-naphthalene 5a

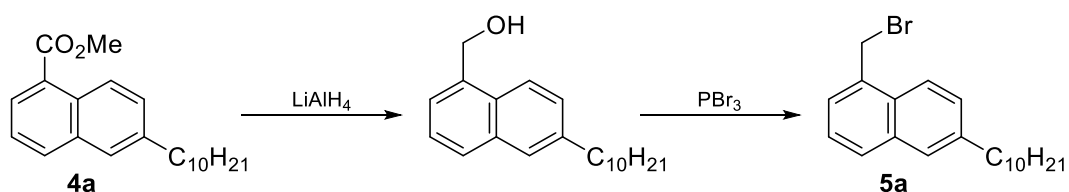

To a mixture of  $\text{LiAlH}_4$  (284 mg, 7.48 mmol) in THF (50 ml) was dropwise added a solution of compound **4a** (1.22 g, 3.74 mmol) in THF (10 ml). The reaction mixture was stirred at r.t. for 17.5 h. The reaction was quenched with water (5 ml) and the THF was removed under reduced pressure. The residue was shaken with a mixture of AcOEt (50 ml) and 10% HCl (20 ml). The organic phase was collected, washed with  $\text{NaHCO}_3$  aq., dried ( $\text{Na}_2\text{SO}_4$ ), and concentrated to afford (6-decylnaphthalen-1-yl)methanol (1.08 g, 96%) as an off-white solid.

**Mp** 48–50°C

**$^1\text{H}$  NMR** (600 MHz,  $\text{CDCl}_3$ )  $\delta_{\text{H}}$  8.06 (d, 1H,  $J = 8.6$  Hz), 7.75 (d, 1H,  $J = 8.0$  Hz), 7.65 (brs, 1H), 7.45 (brd, 1H,  $J = 6.7$  Hz), 7.43–7.39 (2H, d and dd signals overlap), 5.14 (s, 2H), 2.77 (t, 2H,  $J = 7.4$  Hz), 1.70 (quin, 2H,  $J = 7.4$  Hz), 1.40–1.20 (m, 14H), 0.88 (t, 3H,  $J = 6.9$  Hz).

**$^{13}\text{C}$  NMR** (151 MHz,  $\text{CDCl}_3$ )  $\delta_{\text{C}}$  140.70, 136.21, 134.17, 129.77, 128.32, 128.10, 127.24, 125.52, 124.71, 123.65, 63.97, 36.11, 32.05, 31.52, 29.77, 29.75, 29.69, 29.48 (2C), 22.83, 14.28.

**HRMS** (FAB)  $m/z$  Calcd. for  $\text{C}_{21}\text{H}_{30}\text{O}$ : 298.2297. Found. 298.2269 ( $\text{M}^+$ )

To a solution of (6-decylnaphthalen-1-yl)methanol (1.08 g, 3.62 mmol) in dioxane (20 ml) was added  $\text{PBr}_3$  (1.95 g, 7.24 mmol). The mixture was stirred at r.t. for 15 h. The reaction was quenched with sat.  $\text{NaHCO}_3$ . Dioxane was removed under reduced pressure and the residue was extracted with a mixture of toluene (50 ml) and water (30 ml). The insoluble materials were filtered and washed with toluene. The extract and washings were combined and dried ( $\text{Na}_2\text{SO}_4$ ). The solvent was removed under reduced pressure to afford 1-(bromomethyl)-6-decylnaphthalene **5a** (1.04 g, 79%).

**Mp** 53–54°C

**$^1\text{H}$  NMR** ( $\text{CDCl}_3$ , 600 MHz)  $\delta_{\text{H}}$  8.07 (d, 1H,  $J = 8.4$  Hz), 7.78 (d, 1H,  $J = 8.0$  Hz), 7.66 (brs, 1H), 7.45–7.46 (m, 2H), 7.37 (dd,  $J = 8.1, 7.0$  Hz), 4.96 (s, 2H), 2.78 (t, 2H,  $J = 7.7$  Hz), 1.71 (quin, 2H,  $J = 7.5$  Hz), 1.41–1.20 (m, 14H), 0.88 (t, 3H,  $J = 7.0$  Hz).

**$^{13}\text{C}$  NMR** ( $\text{CDCl}_3$ , 151 MHz)  $\delta_{\text{C}}$  141.09, 134.38, 133.16, 129.60, 129.50, 128.34, 127.40, 127.06, 125.49, 123.69, 36.08, 32.09, 32.05, 31.46, 29.77, 29.74, 29.68, 29.50, 29.48, 22.84, 14.28.

**HRMS** (FAB)  $m/z$  Calcd. for  $\text{C}_{21}\text{H}_{29}^{79}\text{Br}$ : 360.1453. Found. 360.1424 ( $\text{M}^+$ ).

### 1-(bromomethyl)-6-tetradecylnaphthalene **5b**

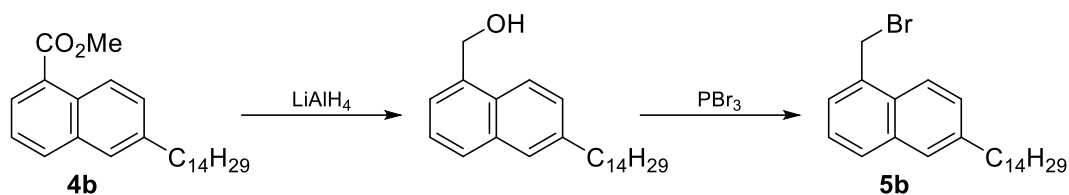

A solution of compound **4b** (300 mg, 0.786 mmol) in dry THF (5 mL) was added dropwise to a suspension of LiAlH<sub>4</sub> (63.6 mg, 1.68 mmol) in dry THF (5 mL) at 0 °C. The resulting mixture was stirred at room temperature for 3 h. Then, water (0.5 mL) was dropwise added to quench the reaction and, subsequently, 10% aqueous NaOH (2 mL) was added. The resulting mixture was extracted with ethyl acetate (3 × 10 mL). The combined organic layer was dried over anhydrous MgSO<sub>4</sub>, and concentrated to afford (6-tetradecylnaphthalen-1-yl)methanol (269 mg, 0.759 mmol, 97%) as colorless needles.

**Mp** 63.0–64.0 °C.

**<sup>1</sup>H NMR** (600 MHz, CDCl<sub>3</sub>) δ<sub>H</sub> 8.06 (d, *J* = 8.6 Hz, 1H), 7.75 (d, *J* = 8.0 Hz, 1H), 7.65 (s, 1H), 7.46–7.40 (m, 3H), 5.14 (s, 2H), 2.78 (t, *J* = 7.5 Hz, 2H), 1.72–1.69 (m, 3H), 1.34–1.26 (m, 22H), 0.88 (t, *J* = 6.6, Hz, 3H).

**<sup>13</sup>C NMR** (151 MHz, CDCl<sub>3</sub>) δ<sub>C</sub> 140.7, 136.2, 134.2, 129.8, 128.3, 128.1, 127.3, 125.5, 124.7, 123.7, 64.0, 36.1, 32.1, 31.5, 29.9, 29.82\*, 29.81, 29.75, 29.7, 29.51, 29.49, 22.8, 14.3.

**Anal.** Calcd. for C, 84.69; H, 10.80. Found C, 84.53; H, 10.49.

To a solution of (6-tetradecylnaphthalen-1-yl)methanol (925 mg, 2.61 mmol) in dioxane (20 ml) was added PBr<sub>3</sub> (1.41 g, 5.22 mmol). The mixture was stirred at r.t. for 15 h. The reaction was quenched with sat. NaHCO<sub>3</sub>. Dioxane was removed under reduced pressure and the residue was extracted with a mixture of toluene (50 ml) and water (30 ml). The insoluble materials were filtered and washed with toluene. The extract and washings were combined and dried (Na<sub>2</sub>SO<sub>4</sub>). The solvent was removed under reduced pressure to afford compound **5b** (654 g, 60%).

**Mp** 69–71 °C



**<sup>1</sup>H NMR** (CDCl<sub>3</sub>, 600 MHz) δ<sub>H</sub> 8.07 (d, 1H, *J* = 8.4 Hz), 7.78 (d, 1H, *J* = 8.2 Hz), 7.65 (brs, 1H), 7.50–7.46 (m, 2H), 7.37 (dd, *J* = 8.1, 7.1 Hz), 4.96 (s, 2H), 2.78 (t, 2H, *J* = 7.2 Hz), 1.71 (quin, 2H, *J* = 7.5 Hz), 1.43–1.22 (m, 22H), 0.88 (t, 3H, *J* = 7.0 Hz).

**<sup>13</sup>C NMR** (CDCl<sub>3</sub>, 1510 MHz) δ<sub>C</sub> 141.09, 134.39, 133.16, 129.60, 129.50, 128.34, 127.40, 127.06, 125.50, 123.69, 36.08, 32.07, 31.46, 29.84, 29.82 (4C), 29.81, 29.74, 29.68, 29.51, 29.50, 22.85, 14.29,

**HRMS** (FAB) *m/z* Calcd. for C<sub>25</sub>H<sub>37</sub><sup>79</sup>Br: 416.2079. Found. 416.2078 (M<sup>+</sup>).

### ((6-Decylnaphthalen-1-yl)methyl)triphenylphosphonium bromide **6a**

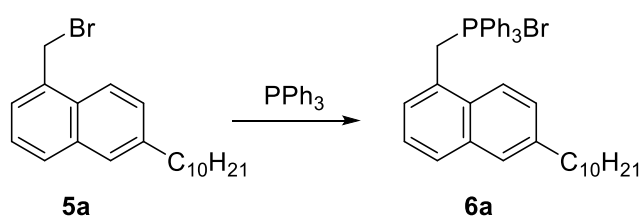

A solution of compound **5a** (900 mg, 2.49 mmol) and PPh<sub>3</sub> (784 mg, 2.99 mmol) in toluene (20 ml) was refluxed for 14 h. The solvent was removed under reduced pressure and the residue was washed with Et<sub>2</sub>O mixture to afford phosphonium salt **6a** as white powder (1.50 g, 96%). This compound was used without further purification in the next Wittig reaction.

**Mp** 158–159°C.

**<sup>1</sup>H NMR** (CDCl<sub>3</sub>, 600 MHz) δ<sub>H</sub> 7.68–7.60 (m, 10H), 7.52–7.47 (m, 6H), 7.43 (brs, 1H), 7.41–7.37 (m, 1H), 7.24 (d, 1H, *J* = 8.7 Hz), 7.14 (t, 1H, *J* = 7.5 Hz), 6.83 (dd, 1H, *J* = 8.7, 1.3 Hz), 5.70 (d, 2H, *J*<sub>CP</sub> = 14.0 Hz), 2.58 (t, 2H, *J* = 7.3 Hz), 1.57 (quin, 2H, *J* = 7.3 Hz), 1.35–1.20 (m, 14H), 0.86 (t, 3H, *J* = 6.8 Hz).

**<sup>13</sup>C NMR** (CDCl<sub>3</sub>, 151 MHz) δ<sub>C</sub> 140.37, 134.93/134.91 (*J*<sub>CP</sub> = 2.9 Hz), 134.40/134.3, (*J*<sub>CP</sub> = 9.8 Hz), 133.75/133.73 (*J*<sub>CP</sub> = 2.9 Hz), 130.87/130.84 (*J*<sub>CP</sub> = 4.0 Hz), 130.15/130.06 (*J*<sub>CP</sub> = 12.4 Hz), 129.71/129.66 (*J*<sub>CP</sub> = 6.6 Hz), 128.84/128.81 (*J*<sub>CP</sub> = 4.3 Hz), 127.91, 126.99, 125.41/125.38 (*J*<sub>CP</sub> = 4.0 Hz), 123.05, 122.87/122.81 (*J*<sub>CP</sub> = 9.2 Hz), 118.06/117.49 (*J*<sub>CP</sub> = 85.0 Hz), 35.68, 31.98, 31.24, 29.74, 29.73, 29.61, 29.42, 29.26, 27.87/27.56 (*J*<sub>CP</sub> = 47.3 Hz), 22.77, 14.22.

### Triphenyl((6-Tetradecylnaphthalen-1-yl)methyl)phosphonium bromide **6b**

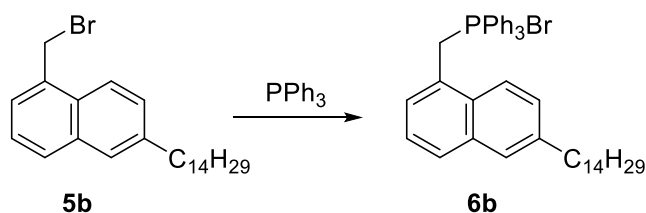

A solution of compound **5b** (600 mg, 1.44 mmol) and  $\text{PPh}_3$  (452 mg, 1.72 mmol) in toluene (20 ml) was refluxed for 14 h. The solvent was removed under reduced pressure and the residue was washed with  $\text{Et}_2\text{O}$  mixture to afford phosphonium salt **6b** as white powder (905 mg, 92%). This compound was used without further purification in the next Wittig reaction.

**Mp** >300°C.

**$^1\text{H}$  NMR** ( $\text{CDCl}_3$ , 600 MHz)  $\delta_{\text{H}}$  7.70–7.62 (m, 10H), 7.53–7.48 (m, 6H), 7.45 (brs, 1H), 7.44–7.40 (m, 1H), 7.25 (d, 1H, overlapped with  $\text{CHCl}_3$  signal), 7.18 (t, 1H,  $J = 7.6$  Hz), 6.84 (dd, 1H,  $J = 8.7, 1.3$  Hz), 5.77 (d, 2H,  $J_{\text{CP}} = 13.7$  Hz), 2.60 (t, 2H,  $J = 7.4$  Hz), 1.56 (quin, 2H,  $J = 7.3$  Hz), 1.35–1.20 (m, 22H), 0.87 (t, 3H,  $J = 6.8$  Hz).

**$^{13}\text{C}$  NMR** ( $\text{CDCl}_3$ , 151 MHz)  $\delta_{\text{C}}$  140.38, 134.93/134.91 ( $J_{\text{CP}} = 2.9$  Hz), 134.47/134.40 ( $J_{\text{CP}} = 9.8$  Hz), 133.80/133.78 ( $J_{\text{CP}} = 2.6$  Hz), 130.93/130.91 ( $J_{\text{CP}} = 4.3$  Hz), 130.16/130.08 ( $J_{\text{CP}} = 12.4$  Hz), 129.81/129.76 ( $J_{\text{CP}} = 7.2$  Hz), 128.86/128.83 ( $J_{\text{CP}} = 4.3$  Hz), 127.94, 127.04, 125.46/125.43 ( $J_{\text{CP}} = 4.0$  Hz), 123.08, 122.92/122.86 ( $J_{\text{CP}} = 9.2$  Hz), 118.18/117.62 ( $J_{\text{CP}} = 85.0$  Hz), 35.72, 32.03, 31.28, 29.82, 29.81, 29.79, 29.77, 29.66, 29.48, 29.31, 27.93/27.61 ( $J_{\text{CP}} = 47.3$  Hz), 22.81, 14.25.

### (6-Phenylnaphthalen-1-yl)methanol **7**

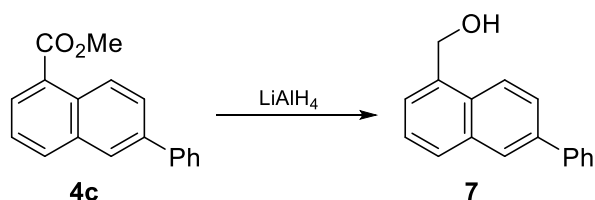

To an ice-cooled suspension of  $\text{LiAlH}_4$  (307 mmol) in THF (20 ml) was added a solution of compound **4c** (1.41 g, 5.39 mmol) in THF (15 ml). The resulting mixture was stirred at r.t. for 19.3 h. The reaction was quenched with  $\text{EtOH}$  and the solvent was removed under reduced pressure. The residue was extracted with a mixture of  $\text{AcOEt}$  (50 ml) and 10%  $\text{HCl}$  (30 ml).

The organic phase was collected and the aqueous phase was extracted with AcOEt (2 × 30 ml). The combined organic phases were washed with NaHCO<sub>3</sub> aq. and dried (Na<sub>2</sub>SO<sub>4</sub>). The solvent was removed and washed with toluene to afford desired product **7** (**A** 859 mg). The washings were concentrated and residual material was separated with silica-gel column (toluene) to afford additional product **7** (**B** 217 mg). The total yield (**A** + **B**) of compound **7** was 1.07 g (85%).

**Mp**: 130–131°C (colorless crystals).

**<sup>1</sup>H NMR** (CDCl<sub>3</sub>, 600 MHz) δ<sub>H</sub> 8.22 (d, 1H, *J* = 8.6 Hz), 8.08 (d, 1H, *J* = 2.0 Hz), 7.88 (d, 1H, *J* = 8.1 Hz), 7.83 (dd, 1H, *J* = 8.6, 2.0 Hz), 7.76–7.71 (m, 2H), 7.55–7.46 (m, 4H), 7.42–7.37 (m, 1H), 5.19 (s, 2H).

**<sup>13</sup>C NMR** (CDCl<sub>3</sub>, 151 MHz) δ<sub>C</sub> 140.98, 138.69, 136.33, 134.25, 130.55, 129.05, 129.04, 127.61, 127.53, 126.62, 126.16, 126.02, 125.56, 124.43, 63.90.

**HRMS** (FAB) Calcd. for C<sub>17</sub>H<sub>14</sub>O, 234.1045. Found, *m/z* 234.1067 (M<sup>+</sup>).

### 6-Phenyl-1-naphthaldehyde **8**

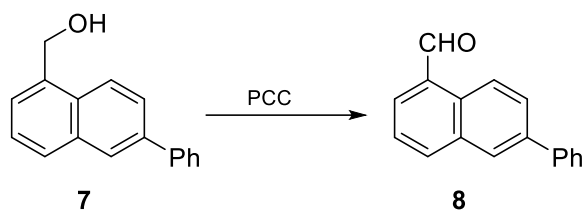

To a solution of compound **7** (344 mg, 1.46 mmol) in CH<sub>2</sub>Cl<sub>2</sub> (10 ml) was added pyridinium chlorochromate (PCC, 629 mg, 2.92 mmol). The dark brown mixture was stirred at r.t. for 1 h. The reaction mixture was filtered through a short silica-gel column using CH<sub>2</sub>Cl<sub>2</sub>. The solvent was removed to afford aldehyde **8** (320 mg, 92 %).

**Mp**: 91–92.5°C (colorless plates).

**<sup>1</sup>H NMR** (CDCl<sub>3</sub>, 600 MHz): δ<sub>H</sub> 10.41 (s, 1H), 9.33 (d, 1H, *J* = 8.8 Hz), 8.15 (d, 1H, *J* = 8.2 Hz), 8.11 (d, 1H, *J* = 1.9 Hz), 7.99 (dd, 1H, *J* = 7.0, 1.1 Hz), 7.97 (dd, 1H, *J* = 8.8, 1.9 Hz), 7.75–7.72 (m, 2H), 7.66 (dd, 1H, *J* = 8.1, 7.1 Hz), 7.53–7.49 (m, 2H), 7.44–7.40 (m, 1H), .

**<sup>13</sup>C NMR** (CDCl<sub>3</sub>, 151 MHz): δ<sub>C</sub> 193.70, 140.42, 139.68, 136.74, 135.63, 134.22, 131.45, 129.73, 129.11, 128.80, 127.91, 127.53, 126.23, 125.60, 125.45.

The NMR spectral data were identical with those previously reported.<sup>S3</sup>

[S3] Y. Mao, J. Jiang, D. Yuan, X. Chen, Y. Wang, L. Hu, Y. Zhang, Overcoming peri- and ortho-selectivity in C–H methylation of 1-naphthaldehydes by a tunable transient ligand strategy, *Chem. Sci.*, 2022, **13**, 2900–2908.

### Triphenyl((6-phenylnaphthalen-1-yl)methyl)phosphonium bromide **8**

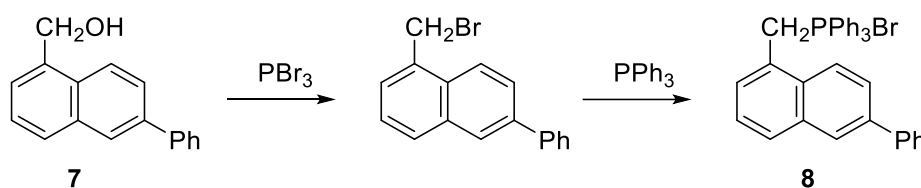

To an ice-cooled solution of 1-hydroxymethyl-6-phenylnaphthalene (980 mg, 4.18 mmol) in  $\text{CH}_2\text{Cl}_2$  (20 ml) was dropwise added a solution of  $\text{PBr}_3$  (2.72 g, 10 mmol) in  $\text{CH}_2\text{Cl}_2$  (5 ml). The resulting mixture was stirred at  $0^\circ\text{C}$  for 10 min. Then, the reaction was allowed to warm to r.t. and stirred at r.t. for 2 h. The reaction was quenched with water and the organic phase was collected, washed with water,  $\text{NaHCO}_3$  aq., and dried ( $\text{Na}_2\text{SO}_4$ ). The solvent was removed and the residue was passed through a short silica-gel column (toluene) to afford 1-bromomethyl-6-phenylnaphthalene (1.16 g, 93%).

Colorless crystals, mp,  $143\text{--}145^\circ\text{C}$ .

$^1\text{H NMR}$  ( $\text{CDCl}_3$ , 600 MHz)  $\delta_{\text{H}}$  8.24 (d, 1H,  $J = 8.8$  Hz), 8.09 (d, 1H,  $J = 1.9$  Hz), 7.92–7.88 (m, 2H, d and dd signals overlap), 7.76–7.72 (m, 2H), 7.55 (dd, 1H,  $J = 7.0, 1.0$  Hz), 7.52–7.49 (m, 2H), 7.44 (dd, 1H,  $J = 8.2, 7.0$ ), 7.42–7.38 (m, 1H), 5.00 (s, 2H).

$^{13}\text{C NMR}$  ( $\text{CDCl}_3$ , 151 MHz)  $\delta_{\text{C}}$  140.82, 139.11, 134.50, 133.37, 130.36, 130.23, 129.09, 127.90, 127.74, 127.58, 126.81, 126.46, 126.03, 124.47, 31.84.

**HRMS** (FAB) Calcd. for  $\text{C}_{17}\text{H}_{13}^{79}\text{Br}$ , 296.0201. Found,  $m/z$  296.0177 ( $\text{M}^+$ ).

A solution of 1-bromomethyl-6-phenylnaphthalene (1.00 g, 3.36 mmol) and  $\text{PPh}_3$  (1.06 g, 4.04 mmol) in toluene (40 ml) was refluxed for 14.5 h. The precipitate formed was collected and washed with toluene to afford phosphonium salt **9** as colorless crystals (1.79 g, 95%).

**Mp**,  $271\text{--}273^\circ\text{C}$ .

**<sup>1</sup>H NMR** (CDCl<sub>3</sub>, 600 MHz) δ<sub>H</sub> 7.82 (d, 1H, *J* = 1.7 Hz), 7.70-7.61 (m, 10H), 7.56-7.52 (m, 2H), 7.51-7.46 (m, 6H), 7.46-7.40 (m, 4H), 7.36-7.32 (m, 1H), 7.22 (dd, 1H, *J* = 8.6, 1.7 Hz), 7.16 (ddd, 1H, *J* = 8.0, 7.2, 0.8 Hz).

**<sup>13</sup>C NMR** (CDCl<sub>3</sub>, 151 MHz) δ<sub>C</sub> 140.25, 137.99, 134.94\*, 134.92\* (*J*<sub>C-P</sub> = 2.8 Hz), 134.50\*, 134.44\* (*J*<sub>C-P</sub> = 9.8 Hz), 133.75\*, 133.73\* (*J*<sub>C-P</sub> = 2.8 Hz), 131.57\*, 131.54\* (*J*<sub>C-P</sub> = 4.3 Hz), 130.68\*, 130.64\* (*J*<sub>C-P</sub> = 6.6 Hz), 130.16\*, 130.08\* (*J*<sub>C-P</sub> = 12.4 Hz), 129.49\*, 129.46\* (*J*<sub>C-P</sub> = 4.3 Hz), 128.99, 127.68, 127.22, 126.09, 125.86\*, 125.84\* (*J*<sub>C-P</sub> = 4.3 Hz), 125.73, 124.12, 123.20\*, 123.14\* (*J*<sub>C-P</sub> = 9.2 Hz), 118.06\*, 117.49\* (*J*<sub>C-P</sub> = 85.3 Hz), 27.89, 27.58 (*J*<sub>C-P</sub> = 47.3 Hz). (The asterisked signals show coupling with <sup>31</sup>P.)

**HRMS** (FAB) Calcd. for C<sub>35</sub>H<sub>28</sub>P<sup>+</sup>, 479.1929. Found, *m/z* 479.1932 (M<sup>+</sup>)

### 1-Methyl-7-phenylphenanthrene **12**

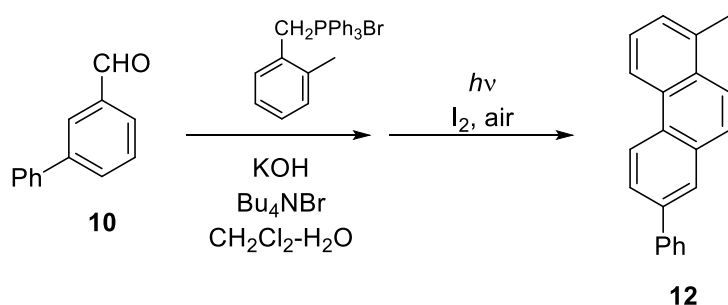

**Method 1:** To a solution of (*o*-tolylmethyl)triphenylphosphonium bromide (984 mg, 2.2 mmol), 3-phenylbenzaldehyde **10** (364 mg, 2.0 mmol) and Bu<sub>4</sub>NBr (64 mg, 0.20 mmol) in CH<sub>2</sub>Cl<sub>2</sub> (10 ml) was added a solution of KOH (1.2 g, 21 mmol) in water (1.2 ml). The mixture was stirred at r.t. for 15 h. The organic phase was separated, washed with water, dried (Na<sub>2</sub>SO<sub>4</sub>), and concentrated. The residue was chromatographed on silica-gel (hexane). The obtained oil (438 mg) was dissolved in cyclohexane (500 ml) and small pieces of I<sub>2</sub> was added. The solution was irradiated with black-light lamps (16 × 16 W) with air-bubbling for 22 h. The solvent was removed and the residue was dissolved in CH<sub>2</sub>Cl<sub>2</sub> and the solution was washed with aqueous sodium thiosulfate (10%) and dried (Na<sub>2</sub>SO<sub>4</sub>). CH<sub>2</sub>Cl<sub>2</sub> was removed and the residue was recrystallized from EtOH to afford 1-methyl-7-phenylphenanthrene **12** (156 mg, 29 % for two steps) as colorless plates.

**Mp** 224–225°C.

**<sup>1</sup>H NMR:** (CDCl<sub>3</sub>, 600 MHz) δ<sub>H</sub> 8.77 (d, 1H, *J* = 8.5 Hz), 8.01 (d, 1H, *J* = 8.3 Hz), 8.12 (d, 1H, *J* = 1.9 Hz), 8.00 (d, 1H, *J* = 9.0 Hz), 7.92 (dd, 1H, *J* = 8.5, 1.9 Hz), 7.85 (d, 1H, *J* = 9.0 Hz), 7.79 (m, 2H), 7.57 (dd, 1H, *J* = 8.2, 7.1 Hz), 7.15 (n, 2H), 7.66 (d, 1H, *J* = 7.1 Hz), 7.41 (m, 1H), 2.78 (s, 3H).

**<sup>13</sup>C NMR:** (CDCl<sub>3</sub>, 151 MHz) δ<sub>C</sub> 140.95, 139.19, 135.09, 132.12, 130.97, 130.33, 129.92, 129.04, 127.97, 127.57, 127.51, 127.02, 126.61, 126.43, 125.96, 123.71, 123.47, 121.05, 20.11.

**Anal:** Calcd. for C<sub>21</sub>H<sub>16</sub>, C, 93.99; H, 6.01. Found C, 93.75; H, 5.83.

**Method 2:** To a solution of phosphonium salt **10** (1.18 g, 2.31 mmol) and *o*-tolualdehyde (263 mg, 2.19 mmol) and dicyclohexano-18-crown-6 (86 mg, 0.23 mmol) in CH<sub>2</sub>Cl<sub>2</sub> (20 ml) was added a mixture of KOH (2.6 g) in water (2.6 ml). The mixture was stirred at rt for 14 h. The resulting mixture was washed with water and the organic phase was collected and dried (Na<sub>2</sub>SO<sub>4</sub>). The solvent was removed and the residue was chromatographed (silica gel, hexane). The obtained colorless oil was dissolved in cyclohexane (500 ml) and small pieces of I<sub>2</sub> were added. The resulting solution was irradiated with black-light lamps (16 × 16 W) with air-bubbling for 22 h. The resulting solution was washed with Na<sub>2</sub>S<sub>2</sub>O<sub>4</sub> aq, dried (Na<sub>2</sub>SO<sub>4</sub>) The solvent was removed and the residue was recrystallized from EtOH to afford 1-methyl-6-phenylphenanthrene **12** (156 mg, 29 % for two steps) as colorless plates. The NMR spectral data for the obtained product were the same as those observed for the product produced by the Method 1.

### 1-Bromomethyl-7-phenylnaphthalene **13**

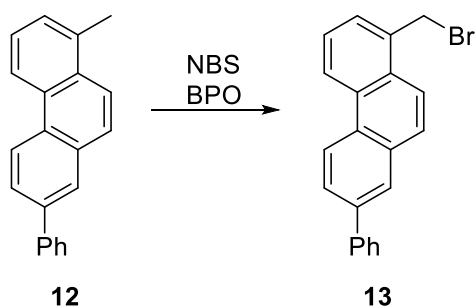

A mixture of compound **12** (250 mg, 0.93 mmol), NBS (164 mg, 0.93 mmol), and BPO (75wt% 30 mg, 0.09 mmol) in CCl<sub>4</sub> (20 ml) was refluxed for 16 h. The solvent was removed and the residue was chromatographed on silica gel (toluene). The crude product, (12 : 13 = 1 : 4), was

recrystallized from a CH<sub>2</sub>Cl<sub>2</sub>-hexane mixture to afford the desired product **13** as pale brown plates (169 mg, 52 %).

**Mp** 201–203°C.

**<sup>1</sup>H NMR** (CDCl<sub>3</sub>, 600 MHz) δ<sub>H</sub> 8.75 (d, 1H, *J* = 8.5 Hz), 8.74 (d, 1H, *J* = 8.1 Hz), 8.07 (d, 1H, *J* = 1.8 Hz), 8.13 (d, 1H, *J* = 9.1 Hz), 7.96 (d, 1H, *J* = 9.1 Hz), 7.94 (dd, 1H, *J* = 8.5, 1.9 Hz), 7.80–7.77 (m, 2H), 7.66 (dd, 1H, *J* = 7.0, 0.9 Hz), 7.61 (t, 1H, *J* = 7.8 Hz), 7.54–7.50 (m, 2H), 7.44–7.39 (m, 1H), 5.03 (s, 2H).

**<sup>13</sup>C NMR** (CDCl<sub>3</sub>, 1510 MHz) δ<sub>C</sub> 140.72, 139.70, 134.07, 132.21, 131.11, 130.02, 129.70, 129.09, 128.54, 128.12, 127.72, 127.52, 126.71, 126.40, 126.32, 124.29, 123.63, 122.60, 32.18.

**Anal:** Calcd. for C<sub>21</sub>H<sub>15</sub>Br, C, 72.64; H, 4.35. Found C, 72.52; H, 4.72.

#### 7-Phenylphenanthrene-1-carbaldehyde **14**

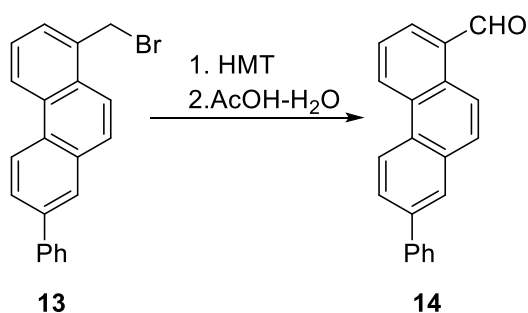

A solution of compound **13** (321 mg, 0.924 mmol) and hexamethylenetetramine (HMT) (259 mg, 1.85 mmol) in CHCl<sub>3</sub> (20 ml) was refluxed for 2.5 h. Another portion of HMT (130 mg, 0.93 mol) was added and the resulting mixture was further refluxed for 2 h. CHCl<sub>3</sub> was removed under reduced pressure and the residue was dissolved in AcOH (15 ml) and water (5 ml). The brown solution was refluxed for 12. The obtained mixture was diluted with sat. NaCl aq. (50 ml) and extracted with CHCl<sub>3</sub> (2 × 30 ml). The extracts were combined, washed with sat. NaHCO<sub>3</sub> aq. then water, dried (Na<sub>2</sub>SO<sub>4</sub>), and concentrated. The residue was chromatographed on silica-gel (CHCl<sub>3</sub>) to afford phenanthrene carboaldehyde (169 mg, 65%) as colorless fine needles.

**Mp:** 202–204°C

**<sup>1</sup>H NMR** (CDCl<sub>3</sub>, 600 MHz): δ<sub>H</sub> 10.53 (s, 1H), 9.19 (d, 1H, *J* = 9.1), 9.00 (d, 1H, *J* = 8.3 Hz), 8.76 (d, 1H, *J* = 8.5 Hz), 8.15 (d, 1H, *J* = 1.9 Hz), 8.11 (dd, 1H, *J* = 7.1, 1.0 Hz), 8.02 (d, 1H, *J*

= 9.1 Hz), 7.97 (dd, 1H,  $J = 8.5, 1.9$  Hz), 7.83 (dd, 1H,  $J = 8.2, 7.2$  Hz), 7.80–7.77 (m, 2H), 7.55–7.51 (m, 2H), 7.45–7.41 (m, 1H).

$^{13}\text{C}$  NMR ( $\text{CDCl}_3$ , 151 MHz):  $\delta_{\text{C}}$  193.75, 140.54, 140.12, 135.35, 132.29, 131.83, 130.92, 130.60, 130.53, 129.22, 129.13, 128.99, 127.85, 127.54, 126.71, 126.61, 125.98, 123.60, 122.81.

### 3-Decyl-9-phenylchryse (PhC10-CHR)

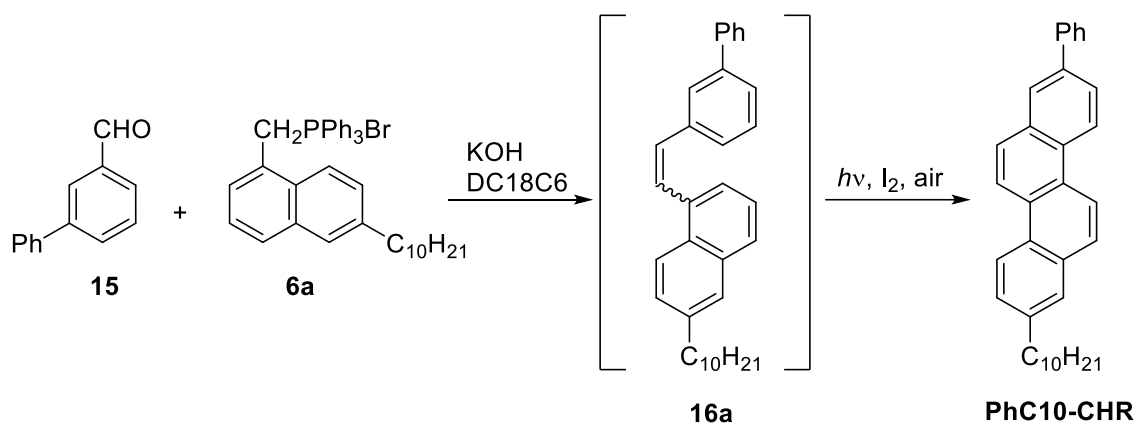

To a mixture of aldehyde **15** (100 mg, 0.55 mmol), phosphonium salt **6a** (311 mg, 0.50 mmol), and dicyclohexano-18-crown-6 (DC18C6, 20 mg, 0.055 mmol) in  $\text{CH}_2\text{Cl}_2$  (10 ml) was added a solution of KOH (0.68 g, 12 mmol) in water (0.7 ml). The mixture was stirred at r.t. for 17 h. Water (20 ml) was added to the resulting mixture. The organic phase was collected, dried ( $\text{Na}_2\text{SO}_4$ ), filtered through a short silica-gel column, and concentrated. The residual diarylethene **17a** (224 mg) was used for the Mallory photoreaction without purification. The crude diarylethene **17a** was dissolved in cyclohexane (200 ml) and small portions of  $\text{I}_2$  was added. The solution was irradiated with black-light lamps ( $6 \times 15$  W) for 4 h. The precipitate formed was collected and washed with toluene and EtOH to afford PhC10-CHR as off-white fine plates (74.3 mg, **A**). The filtrate was irradiated for 14 h. The second crop of PhC10-CHR was collected and washed with toluene and EtOH (14.8 mg, **B**). The total yield (**A** + **B**) of PhC10-CHR was 89.1 mg (40% for two steps).

**Mp**  $>300^\circ\text{C}$  (colorless plates).

$^1\text{H}$  NMR ( $\text{CDCl}_3$ , 600 MHz,  $50^\circ\text{C}$ )  $\delta_{\text{H}}$  8.83 (d, 1H,  $J = 8.6$  Hz), 8.75–8.67 (m, 3H), 8.19 (brs, 1H), 8.04 (d, 1H,  $J = 8.8$  Hz), 8.00–7.94 (m, 2H), 7.85–7.75 (m, 3H), 7.56 (d, 1H,  $J = 8.6$  Hz),



7.54–7.49 (m, 2H), 7.44–7.38 (m, 1H), 2.87 (t, 2H,  $J = 7.7$  Hz), 1.79 (quin, 2H,  $J = 7.3$  Hz), 1.47–1.23 (m, 14H), 0.89 (t, 3H,  $J = 6.7$  Hz).

$^{13}\text{C}$  NMR ( $\text{CDCl}_3$ , 151 MHz,  $50^\circ\text{C}$ )  $\delta_{\text{H}}$  141.43, 141.16, 139.09, 132.70, 132.63, 130.09, 129.09, 128.59, 128.22, 127.91, 127.60, 127.55, 127.49, 126.65, 126.17, 123.89, 123.26, 121.90, 121.38, 36.14, 32.09, 31.57, 29.81, 29.79, 29.73, 29.59, 29.49, 22.83, 14.19.

**Anal:** Calcd. for  $\text{C}_{34}\text{H}_{36}$ , C, 91.84; H, 8.16. Found, C, 91.79; H, 8.25.

### 3-Tetradecyl-9-phenylchrysene (PhC14-CHR)

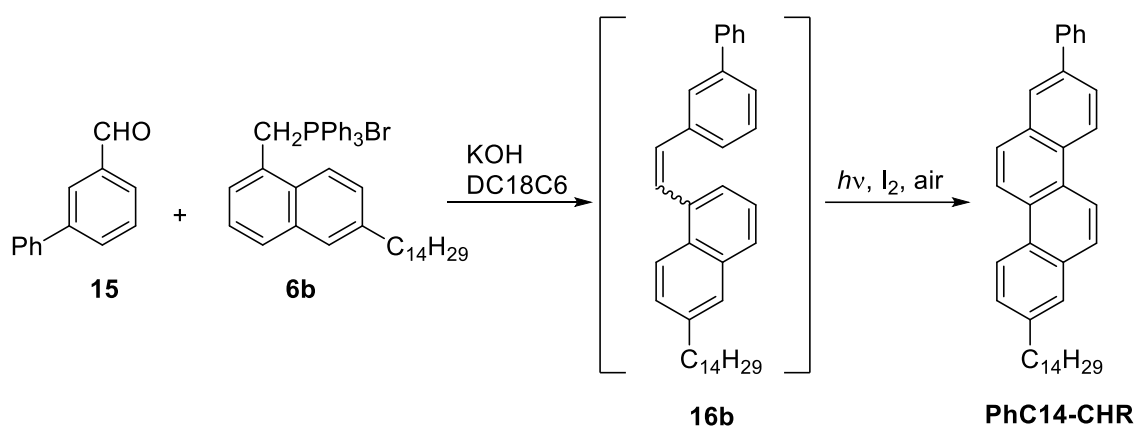

To a mixture of aldehyde **15** (100 mg, 0.55 mmol), phosphonium salt **6b** (340 mg, 0.50 mmol), and dicyclohexano-18-crown-6 (20 mg, 0.055 mmol) in  $\text{CH}_2\text{Cl}_2$  (10 ml) was added a solution of KOH (0.68 g, 12 mmol) in water (0.7 ml). The mixture was stirred at r.t. for 17.5 h. Water (20 ml) was added to the resulting mixture. The organic phase was collected, dried ( $\text{Na}_2\text{SO}_4$ ), filtered through a short silica-gel column, and concentrated. The residual diarylethene **17b** (248 mg) was used for the Mallory photoreaction without purification. The crude diarylethene **17b** was dissolved in cyclohexane (200 ml) and small portions of  $I_2$  was added. The solution was irradiated with black-light lamps ( $6 \times 15$  W) for 5 h. The precipitate formed was collected and washed with toluene and EtOH to afford PhC14-CHR as off-white fine plates (109 mg, 43% for two steps).

**Mp:**  $>300^\circ\text{C}$ .

$^1\text{H}$  NMR (1,1,2,2-tetrachloroethane- $d_2$ , 600 MHz,  $85^\circ\text{C}$ )  $\delta_{\text{H}}$  8.85 (d, 1H,  $J = 8.7$  Hz), 8.76–8.69 (m, 3H), 8.22 (brs, 1H), 8.08 (d, 1H,  $J = 8.9$  Hz), 8.02–7.98 (m, 2H), 7.85–7.80 (m, 3H), 7.61 (d, 1H,  $J = 8.6$  Hz), 7.57–7.53 (m, 2H), 7.46–7.42 (m, 1H), 2.90 (t, 2H,  $J = 7.5$  Hz), 1.84 (quin, 2H,  $J = 7.3$  Hz), 1.53–1.27 (m, 22H), 0.89 (t, 3H,  $J = 6.7$  Hz).

$^{13}\text{C}$  NMR (1,1,2,2-tetrachloroethane- $d_2$ , 151 MHz, 80°C)  $\delta_{\text{C}}$  141.43, 140.78, 138.88, 132.51, 132.44, 129.88, 128.98, 128.87, 128.40, 128.17, 127.70, 127.56, 127.52, 127.43, 127.40, 127.39, 126.46, 126.02, 123.76, 123.14, 121.80, 121.23, 35.93, 31.91, 31.26, 29.66, 29.64, 29.60, 29.53, 29.45, 29.30, 22.65, 14.07.

**Anal:** Calcd. for  $\text{C}_{38}\text{H}_{44}$ , C, 91.14; H, 8.86. Found, C, 91.13; H, 8.99.

### 3-Decyl-10-phenylpicene (PhC10-PIC)

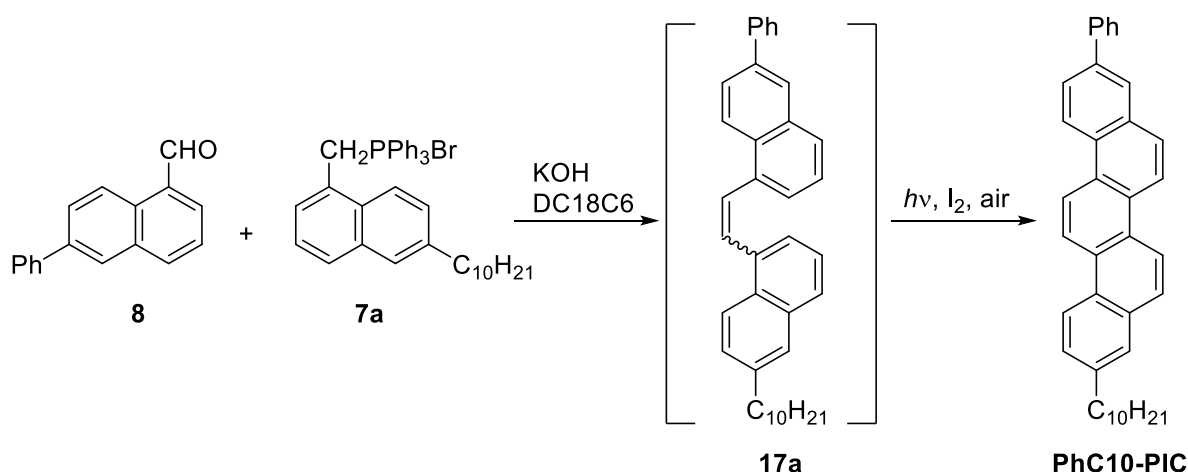

To a solution of phosphonium salt **7a** (250 mg, 0.40 mmol) and aldehyde **8** (102 mg, 0.44 mmol) and dicyclohecano-18-crown-6 (15 mg, 0.04 mmol) in  $\text{CH}_2\text{Cl}_2$  (10 ml) was added a solution of KOH (500 mg, 8.9 mmol) in water (0.5 ml). The mixture was vigorously stirred at r.t. for 17.5 h.  $\text{CH}_2\text{Cl}_2$  (10 ml) and water (10 ml) were added to the resulting mixture. The organic phase was collected, washed with water, dried ( $\text{Na}_2\text{SO}_4$ ). The solution was filtered through a short silica-gel column and concentrated. The residue was dissolved in toluene (200 ml) and a small portion of  $\text{I}_2$  was added. The solution was irradiated with black-light lamps ( $6 \times 16$  W) for 4 h. The precipitate formed was collected and successively washed with toluene and MeOH to afford PhC10-PIC as off-white fine plates (172 mg, 87 % for two steps).

**Mp**  $>300^\circ\text{C}$ .

$^1\text{H}$  NMR (600 MHz, 1,1,2,2-tetrachloroethane- $d_2$ , 100°C):  $\delta_{\text{H}}$  8.99–8.94 (m, 2H), .8.93 (d, 1H,  $J = 8.9$  Hz), 8.82 (d, 1H,  $J = 9.1$  Hz), 8.80–8.76 (two doublets overlap, 2H), 8.25 (s, 1H), 8.11 (d, 1H,  $J = 9.1$  Hz), 8.05–8.01 (two doublets overlap, 2H), 7.87–7.82 (m, 3H), 7.64 (d, 1H,  $J = 8.4$  Hz), 7.56 (t, 2H,  $J = 7.3$  Hz), 7.45 (t, 1H,  $J = 7.0$  Hz), 2.93 (t, 2H,  $J = 7.5$  Hz), 1.86 (quin, 2H,  $J = 7.4$  Hz), 1.56–1.19 (m, 14H), 0.95 (t, 3H,  $J = 6.0$  Hz).  $^{13}\text{C}$  NMR (151 MHz, 1,1,2,2-

tetrachloroethane-d<sub>2</sub>, 100°C):  $\delta_C$  141.66, 140.83, 139.31, 132.35, 132.32, 129.84, 128.94, 128.85, 128.83, 128.46, 128.37, 128.18, 127.67, 127.54, 127.40, 127.36, 126.44, 126.15, 123.74, 123.11, 122.19, 121.87, 121.63, 121.56, 35.93, 31.85, 31.18, 29.56 (2C), 29.49, 29.41, 29.23, 22.58, 13.94.

**Anal** Calcd. for C<sub>38</sub>H<sub>38</sub>, C, 92.26; H, 7.74. Found C, 92.14; H, 7.73.

### 3-Tetradecyl-10-phenylpicene (PhC10-PIC)

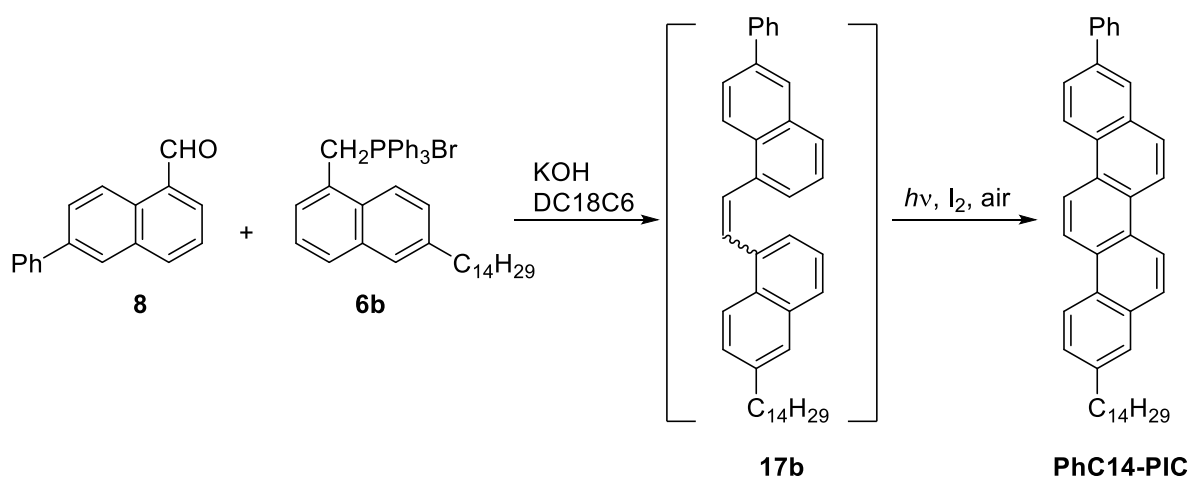

To a solution of phosphonium salt **6b** (272 mg, 0.40 mmol) and aldehyde **8** (102 mg, 0.44 mmol) and dicyclohecano-18-crown-6 (15 mg, 0.04 mmol) in CH<sub>2</sub>Cl<sub>2</sub> (10 ml) was added a solution of KOH (500 mg, 8.9 mmol) in water (0.5 ml). The mixture was vigorously stirred at r.t. for 17.5 h. CH<sub>2</sub>Cl<sub>2</sub> (10 ml) and water (10 ml) were added to the resulting mixture. The organic phase was collected, washed with water, dried (Na<sub>2</sub>SO<sub>4</sub>). The solution was filtered through a short silica-gel column and concentrated. The residue was dissolved in toluene (200 ml) and a small portion of I<sub>2</sub> was added. The solution was irradiated with black-light lamps (6 × 16 W) for 4 h. The precipitate formed was collected and successively washed with toluene and MeOH to afford **PhC14-PIC** as off-white fine plates (183 mg, 83 % for two steps).

**Mp** >300°C.

**<sup>1</sup>H NMR** (600 MHz, 1,1,2,2-tetrachloroethane-d<sub>2</sub>, 100°C):  $\delta_H$  8.98–8.94 (m, 2H), .8.93 (d, 1H,  $J = 8.7$  Hz), 8.82 (d, 1H,  $J = 8.9$  Hz), 8.80–8.76 (two doublets overlap, 2H), 8.25 (s, 1H), 8.11 (d, 1H,  $J = 8.9$  Hz), 8.05–8.01 (two doublets overlap, 2H), 7.87–7.82 (m, 3H), 7.64 (d, 1H,  $J =$

8.2 Hz), 7.56 (t, 2H,  $J = 7.4$  Hz), 7.45 (t, 1H,  $J = 7.0$  Hz), 2.93 (t, 2H,  $J = 7.5$  Hz), 1.86 (quin, 2H,  $J = 7.2$  Hz), 1.56–1.27 (m, 22H), 0.95 (t, 3H),  $J = 6.0$  Hz).

$^{13}\text{C}$  NMR (151 MHz, 1,1,2,2-tetrachloroethane- $d_2$ , 100°C):  $\delta_{\text{C}}$  141.67, 140.84, 139.32, 132.37, 132.33, 129.85, 128.95, 128.86, 128.83, 128.47, 128.37, 128.19, 127.68, 127.55, 127.41, 127.37, 126.44, 126.15, 123.74, 123.12, 122.19, 121.87, 121.64, 121.57, 35.92, 31.86, 31.17, 29.61 (4C), 29.58, 29.55, 29.482, 29.40, 29.24, 22.57, 13.94.

**Anal** Calcd. for  $\text{C}_{42}\text{H}_{46}$ , C, 91.58; H, 8.42. Found C, 91.48; H, 8.41%.

### 3-Decyl-11-phenyl-fulminene PhC10-FUL

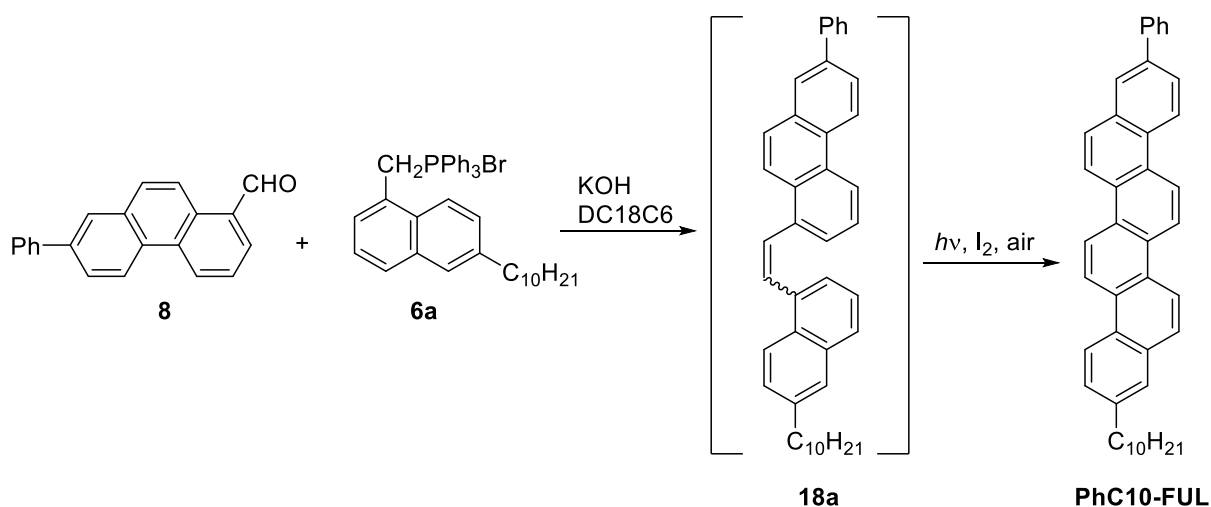

To a mixture of phosphonium salt **6a** (189 mg, 0.30 mmol), aldehyde **14** (90 mg, 0.32 mmol), and dicyclohexano-18-crown-6 (11 mg, 0.03 mmol) in  $\text{CH}_2\text{Cl}_2$  (5 ml) was added an aqueous solution of KOH (0.5 g in 0.5 ml). The mixture was stirred for 22 h. The precipitate was collected, washed with water then EtOH, and dried. The obtained solid (diarylethene **18a**) was dissolved in toluene (200 ml) and small pieces of  $\text{I}_2$  were added. The resulting solution was irradiated with black-light lamps ( $6 \times 16$  W) for 2 h. The precipitated product was collected by suction filtration and washed with toluene. The crude product was recrystallized from *o*-dichlorobenzene to afford PhC10-FUL (108 mg, 65 %) as off-white plates.

**MP**  $>300^\circ\text{C}$ .

$^1\text{H}$  NMR (1,1,2,2-tetrachloroethane- $d_2$ , 100°C)  $\delta_{\text{H}}$  9.05 (d, 1H,  $J = 9.2$  Hz), 9.03 (d, 1H,  $J = 9.4$  Hz), 9.01 (d, 1H,  $J = 9.2$  Hz), 8.98 (d, 1H,  $J = 8.9$  Hz), 8.96 (d, 1H,  $J = 8.4$  Hz), 8.91 (d, 2H,  $J = 8.9$  Hz), 8.86 (d, 1H,  $J = 8.8$  Hz), 8.81 (d, 1H,  $J = 8.3$  Hz), 8.26 (s, 1H), 8.16 (d,  $J = 8.9$  Hz), 8.08–8.04 (m, 2H), 7.88–7.83 (m, 3H), 7.65 (d, 1H,  $J = 8.4$  Hz), 7.57 (t, 2H,  $J = 7.3$  Hz), 7.46

(t, 1H,  $J = 7.3$  Hz), 2.95 (t, 2H,  $J = 7.5$  Hz), 1.88 (quin, 2H,  $J = 7.5$  Hz), 1.57–1.30 (m, 14 H, overlapped with H<sub>2</sub>O), 0.96 (t, 3H,  $J = 6.5$  Hz).

<sup>13</sup>C NMR Not obtained due to low solubility.

**Anal** Calcd for C<sub>46</sub>H<sub>48</sub>; C, 92.60; H, 7.40. Found; C, 92.35; H, 7.24.

### 3-Tetradecyl-11-phenyl-fulminene PhC14-FUL

To a mixture of phosphonium salt **6b** (115 mg, 0.21 mmol), aldehyde **14** (50 mg, 0.17 mmol), and dicyclohexano-18-crown-6 (7.5 mg, 0.02 mmol) in CH<sub>2</sub>Cl<sub>2</sub> (5 ml) was added an aqueous solution of KOH (0.3 g in 0.3 ml). The mixture was stirred for 22 h. The precipitate was collected, washed with water then EtOH, and dried. The obtained solid was dissolved in toluene (100 ml) and small pieces of I<sub>2</sub> were added. The resulting solution was irradiated with black-light lamps (6 × 16 W) for 2h. The precipitated product was collected by suction filtration and washed with toluene. The crude product was recrystallized from *o*-dichlorobenzene to afford **PhC14-FUL** (61 mg, 61 %) as off-white plates.

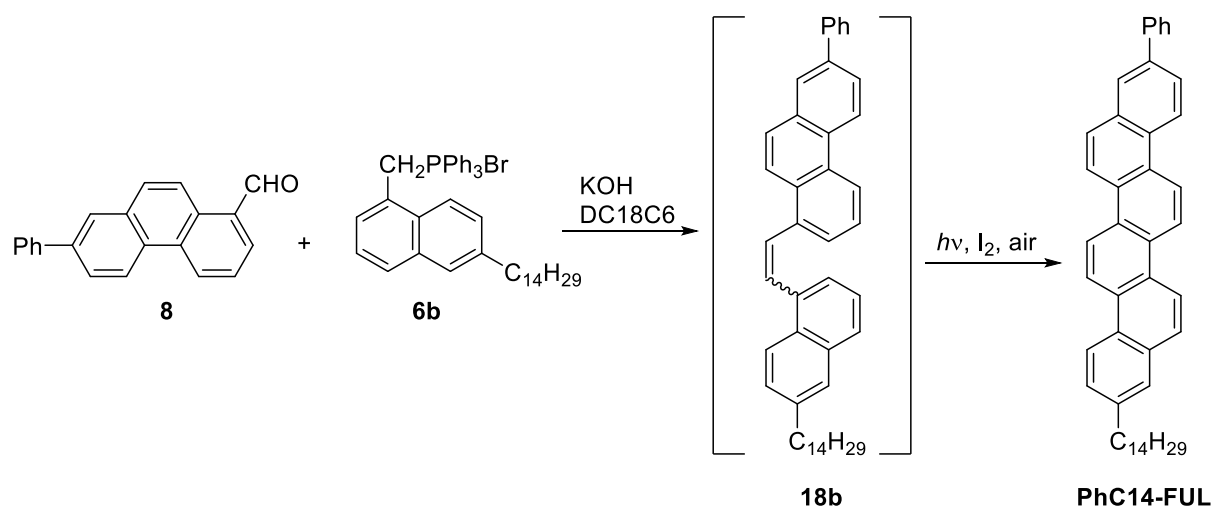

**MP** >300°C.

<sup>1</sup>H NMR (600 MHz, 1,1,2,2-tetrachloroethane-d<sub>2</sub>, 100°C)  $\delta_{\text{H}}$  9.05 (d, 1H,  $J = 9.4$  Hz), 9.03 (d, 1H,  $J = 9.4$  Hz), 9.01 (d, 1H,  $J = 9.2$  Hz), 8.99 (d, 1H,  $J = 9.2$  Hz), 8.95 (d, 1H,  $J = 8.7$  Hz), 8.91 (d, 2H,  $J = 9.1$  Hz), 8.86 (d, 1H,  $J = 9.1$  Hz), 8.80 (d, 1H,  $J = 8.6$  Hz), 8.27 (d, 1H,  $J = 1.0$  Hz), 8.16 (d,  $J = 8.9$  Hz), 8.08–8.04 (m, 2H), 7.88–7.83 (m, 2H), 7.65 (dd, 1H,  $J = 8.6, 1.1$  Hz), 7.57 (t, 2H,  $J = 7.6$  Hz), 7.46 (t, 1H,  $J = 7.3$  Hz), 2.94 (t, 2H,  $J = 7.5$  Hz), 1.86 (quin, 2H,  $J = 7.5$  Hz), 1.56–1.28 (m, 22 H, overlapped with H<sub>2</sub>O), 0.94 (t, 3H,  $J = 7.0$  Hz).

**<sup>13</sup>C NMR** Not obtained due to low solubility.

**Anal** Calcd for C<sub>46</sub>H<sub>48</sub>; C, 91.95; H, 8.05. Found; C, 91.55; H, 8.04.

(2) NMR spectra (Figure S1-1 – S1-24) of compounds synthesized in this study.

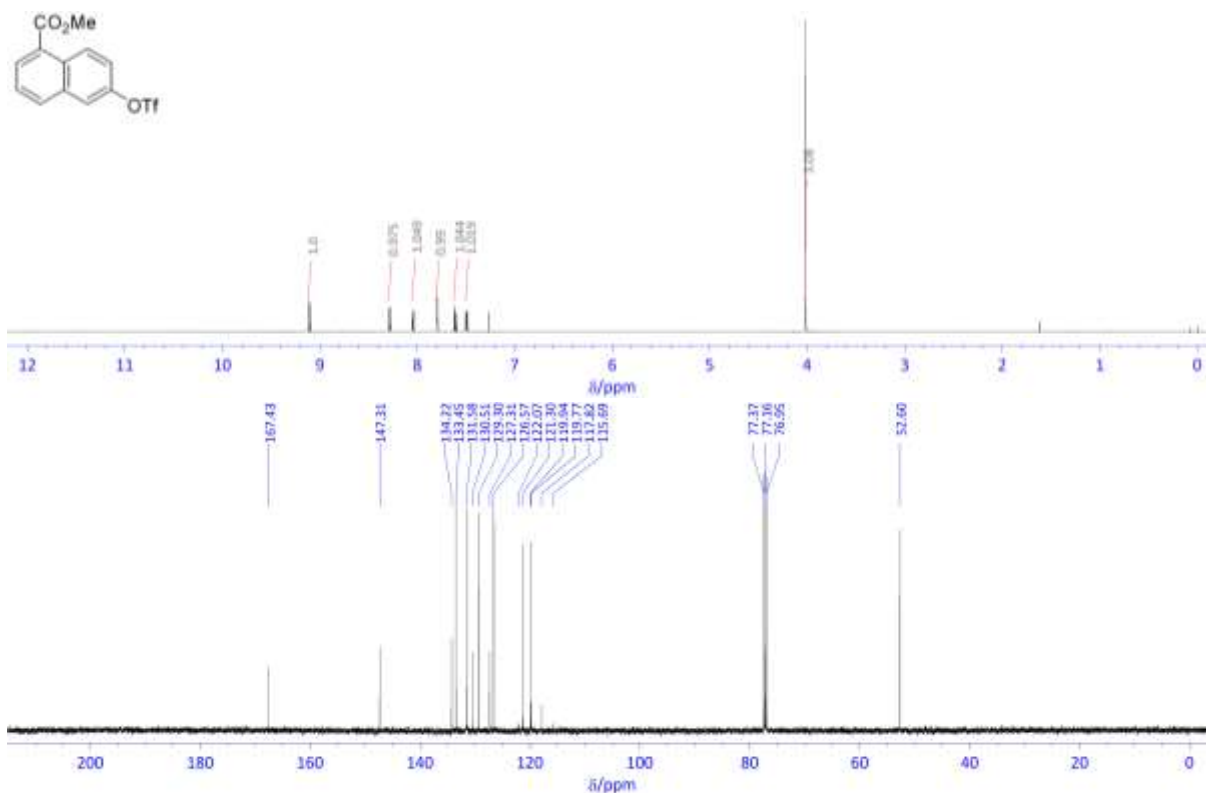

Figure S1-1.  $^1\text{H}$  (600 MHz) and  $^{13}\text{C}$  NMR (151 MHz) spectra of triflate **2** ( $\text{CDCl}_3$ ).

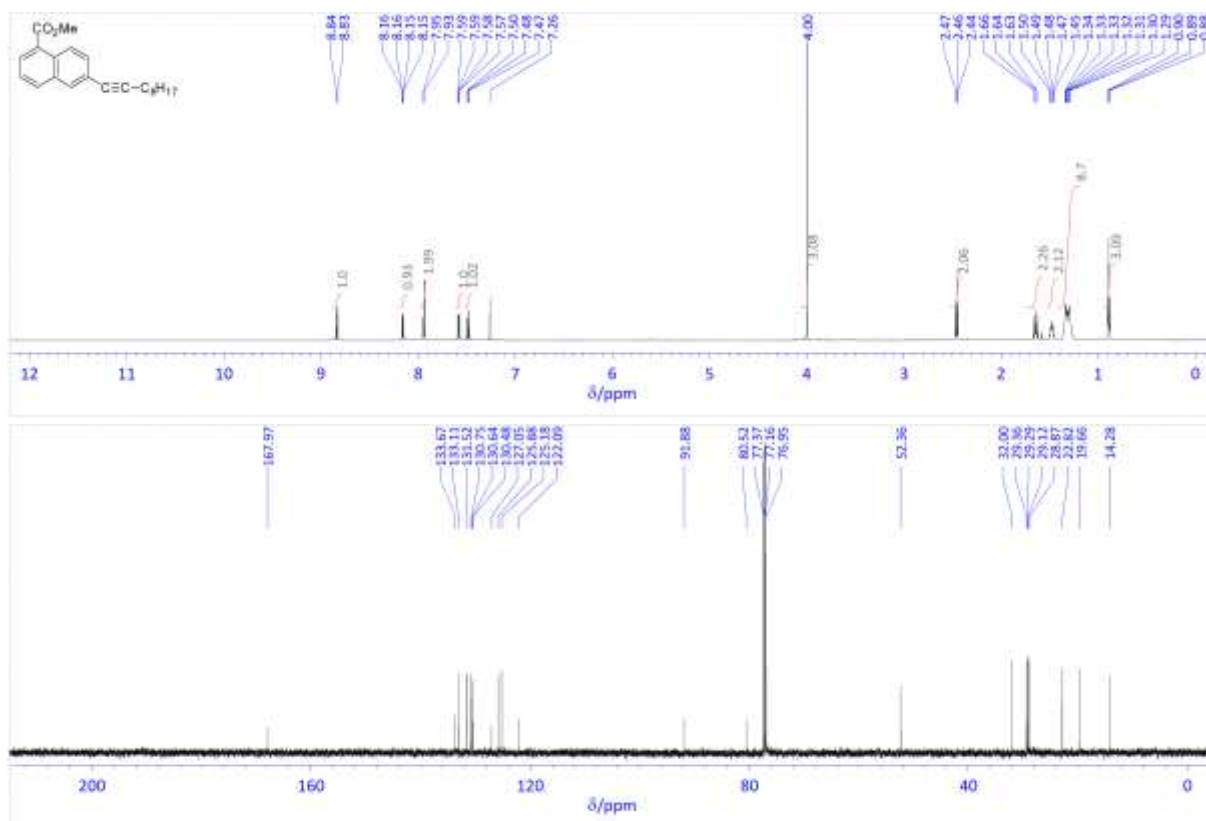

Figure S1-2.  $^1\text{H}$  (600 MHz) and  $^{13}\text{C}$  NMR (151 MHz) spectra of compound **3a** ( $\text{CDCl}_3$ ).

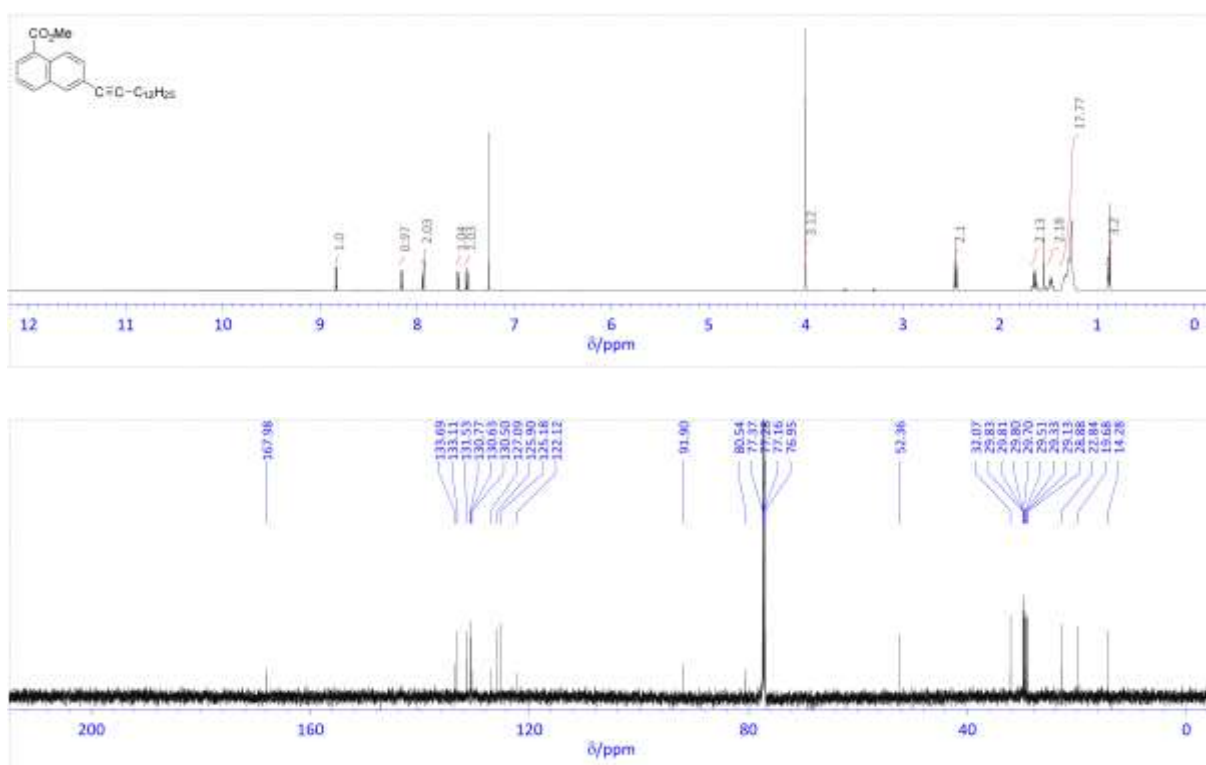

Figure S1-3.  $^1\text{H}$  (600 MHz) and  $^{13}\text{C}$  NMR (151 MHz) spectra of compound **3b** ( $\text{CDCl}_3$ ).

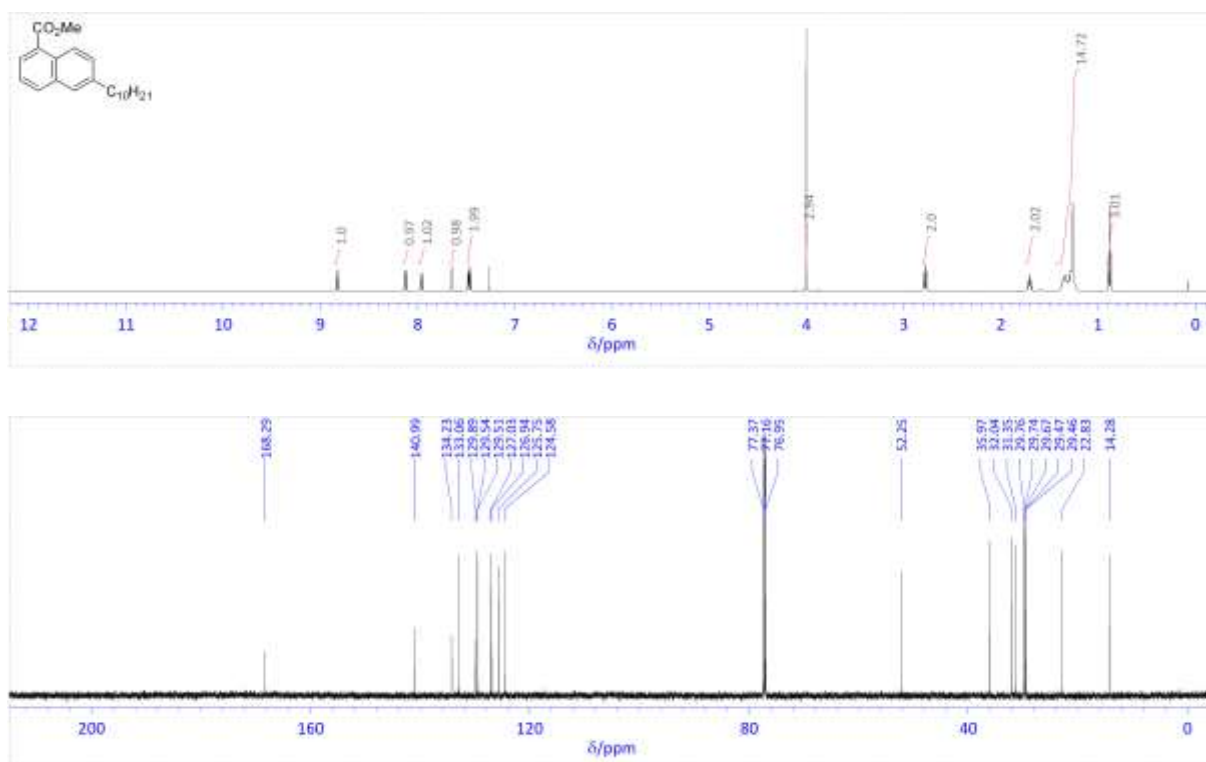

Figure S1-4.  $^1\text{H}$  (600 MHz) and  $^{13}\text{C}$  NMR (151 MHz) spectra of compound **4a** ( $\text{CDCl}_3$ ).



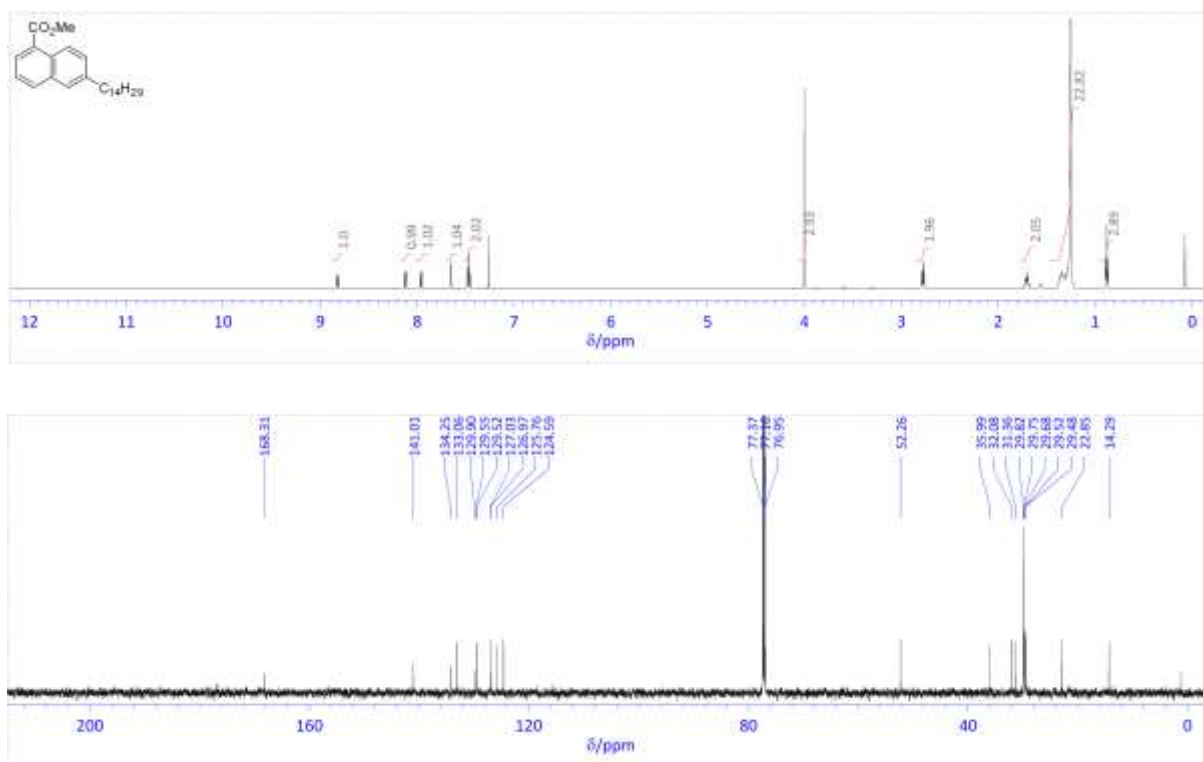

Figure S1-5.  $^1\text{H}$  (600 MHz) and  $^{13}\text{C}$  NMR (151 MHz) spectra of compound **4b** ( $\text{CDCl}_3$ ).

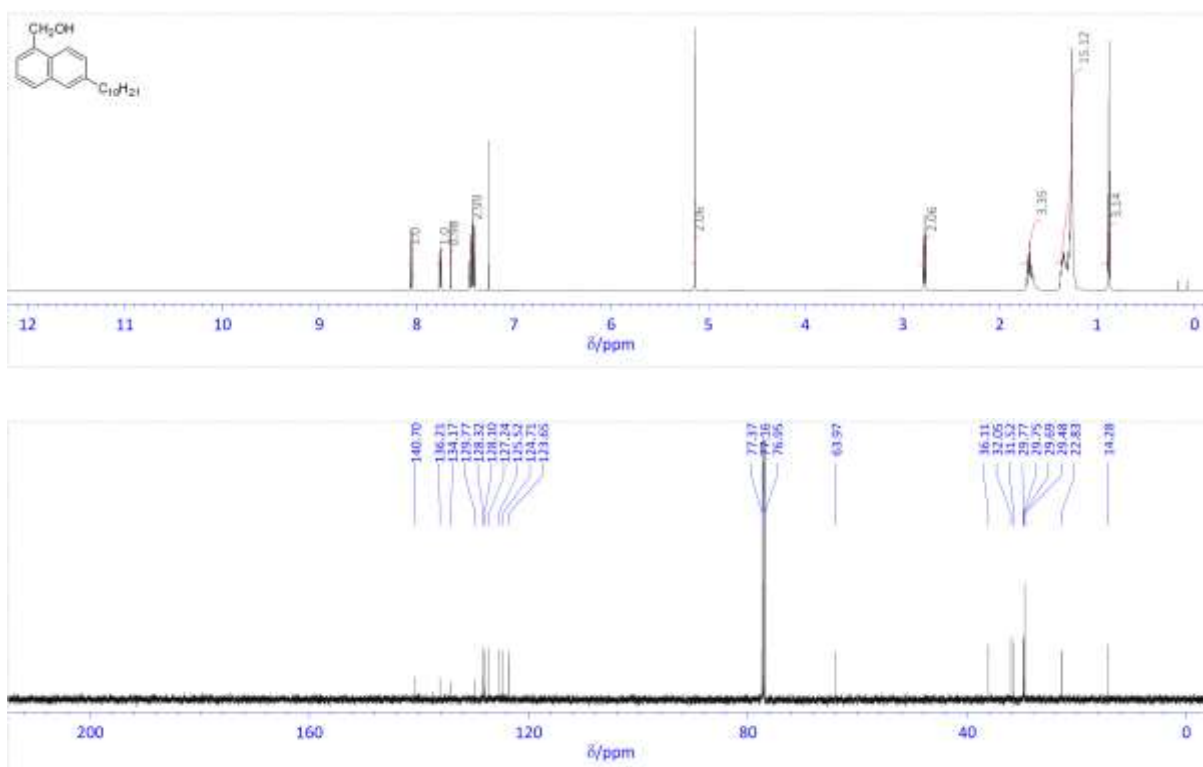

Figure S1-6.  $^1\text{H}$  (600 MHz) and  $^{13}\text{C}$  NMR (151 MHz) spectra of (6-decyl-naphthalen-1-yl)methanol ( $\text{CDCl}_3$ ).

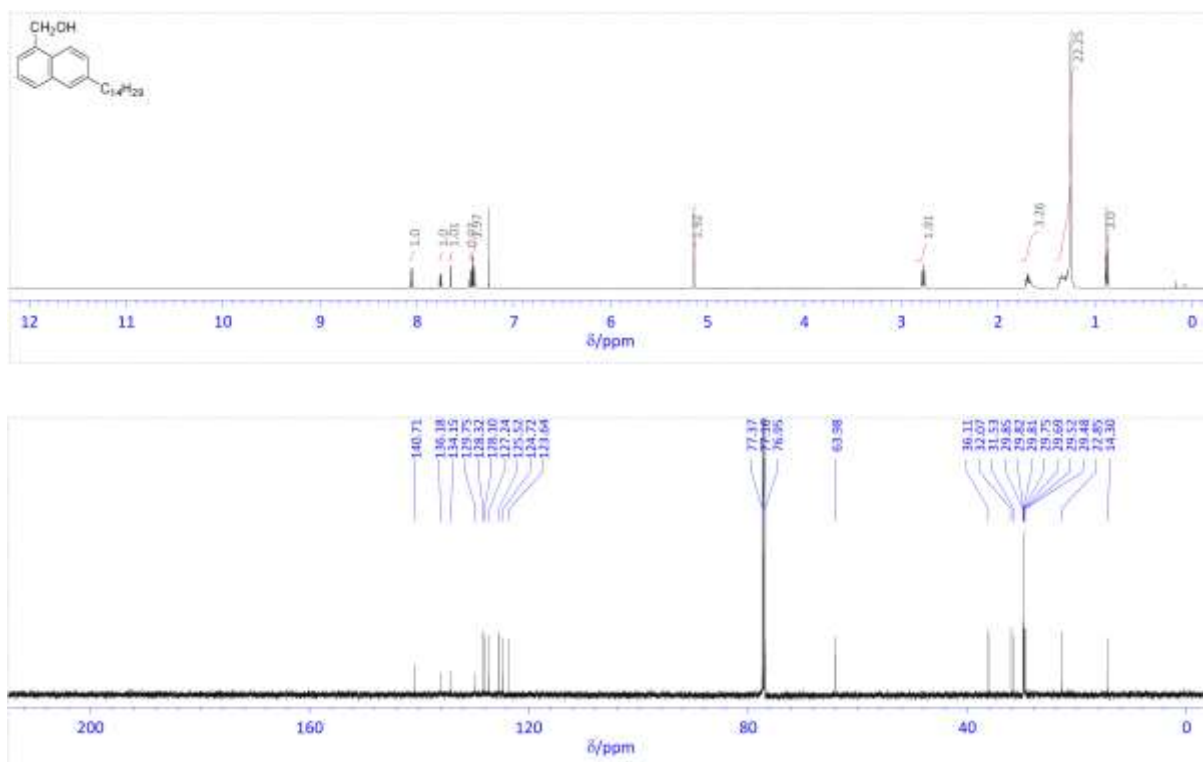

Figure S1-7.  $^1H$  (600 MHz) and  $^{13}C$  NMR (151 MHz) spectra of compound (6-tetradecylnaphthalen-1-yl)methanol ( $CDCl_3$ ).

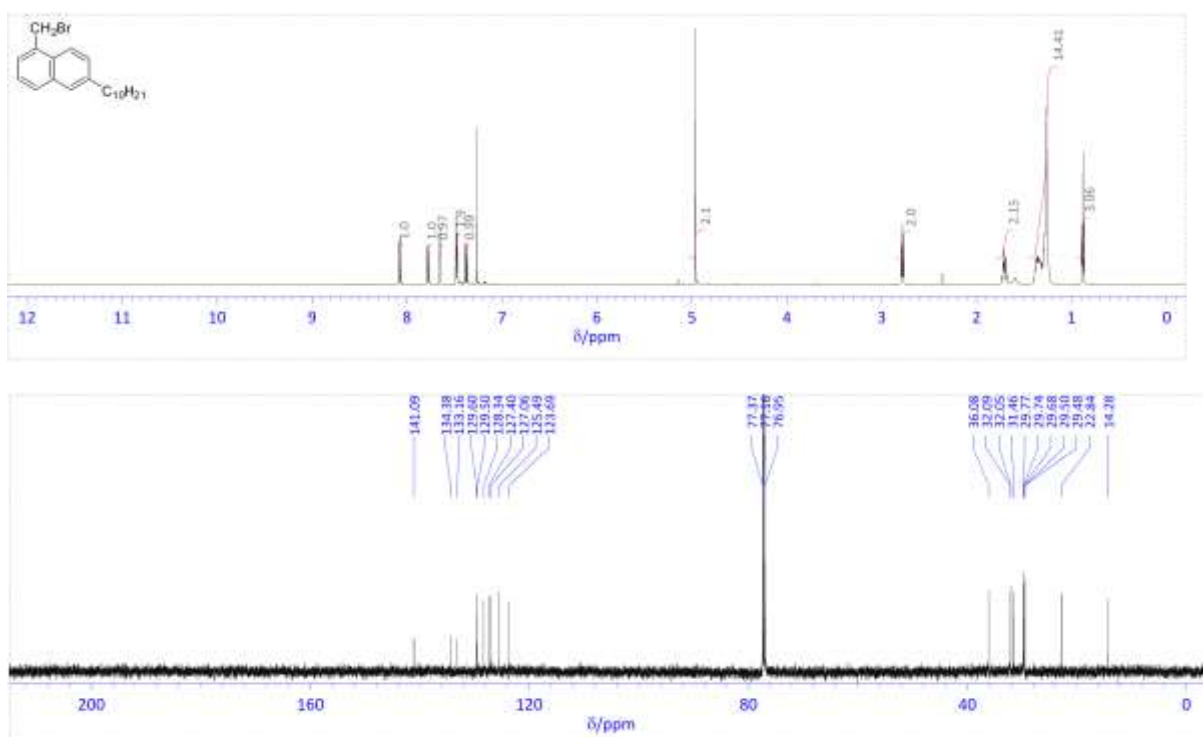

Figure S1-8.  $^1H$  (600 MHz) and  $^{13}C$  NMR (151 MHz) spectra of compound 1-bromomethyl-6-decylnaphthalene **5a** ( $CDCl_3$ ).

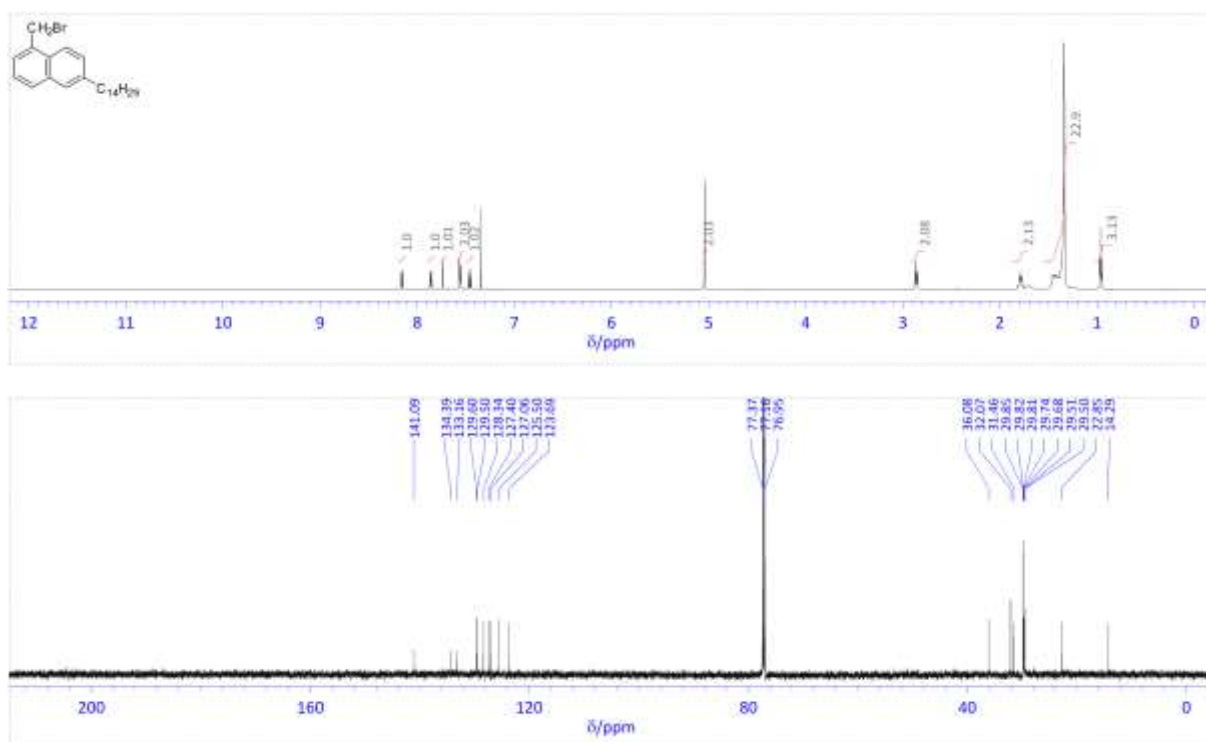

Figure S1-9.  $^1\text{H}$  (600 MHz) and  $^{13}\text{C}$  NMR (151 MHz) spectra of compound 1-bromomethyl-6-tetradecylnaphthalene **5b** ( $\text{CDCl}_3$ ).

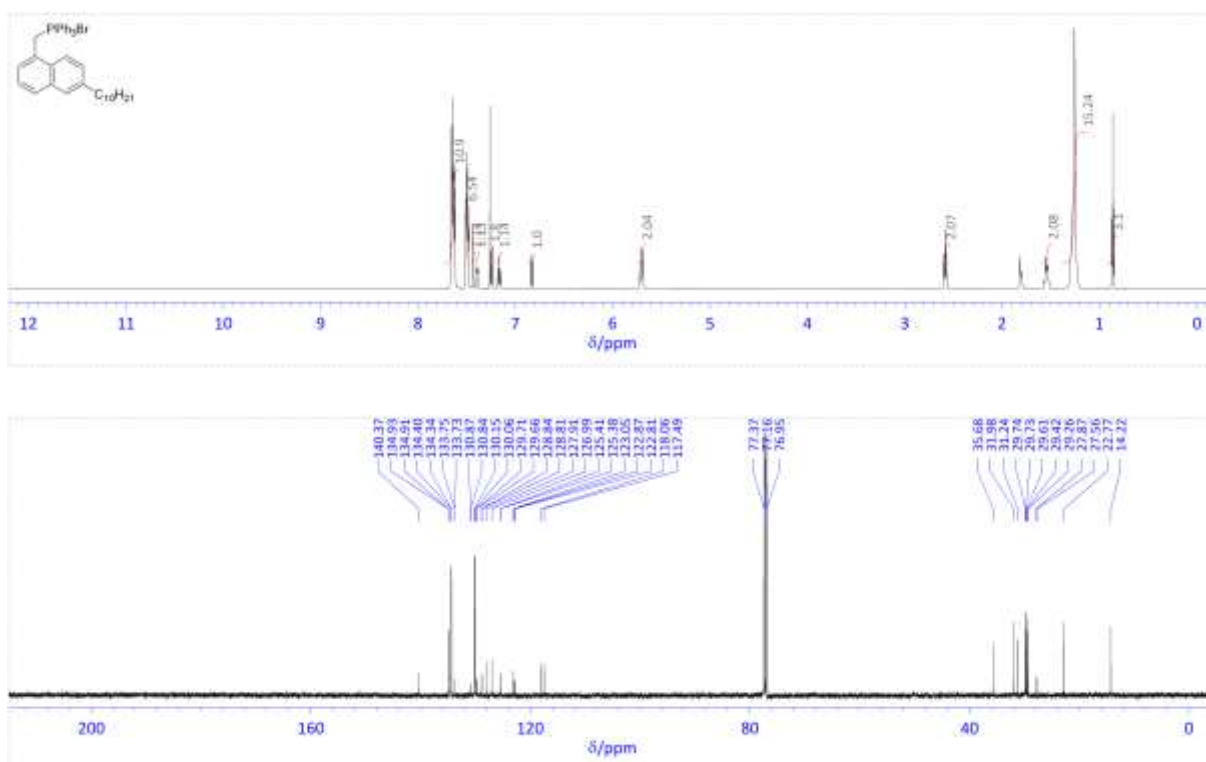

Figure S1-10.  $^1\text{H}$  (600 MHz) and  $^{13}\text{C}$  NMR (151 MHz) spectra of compound phophonium salt **6a** ( $\text{CDCl}_3$ ).

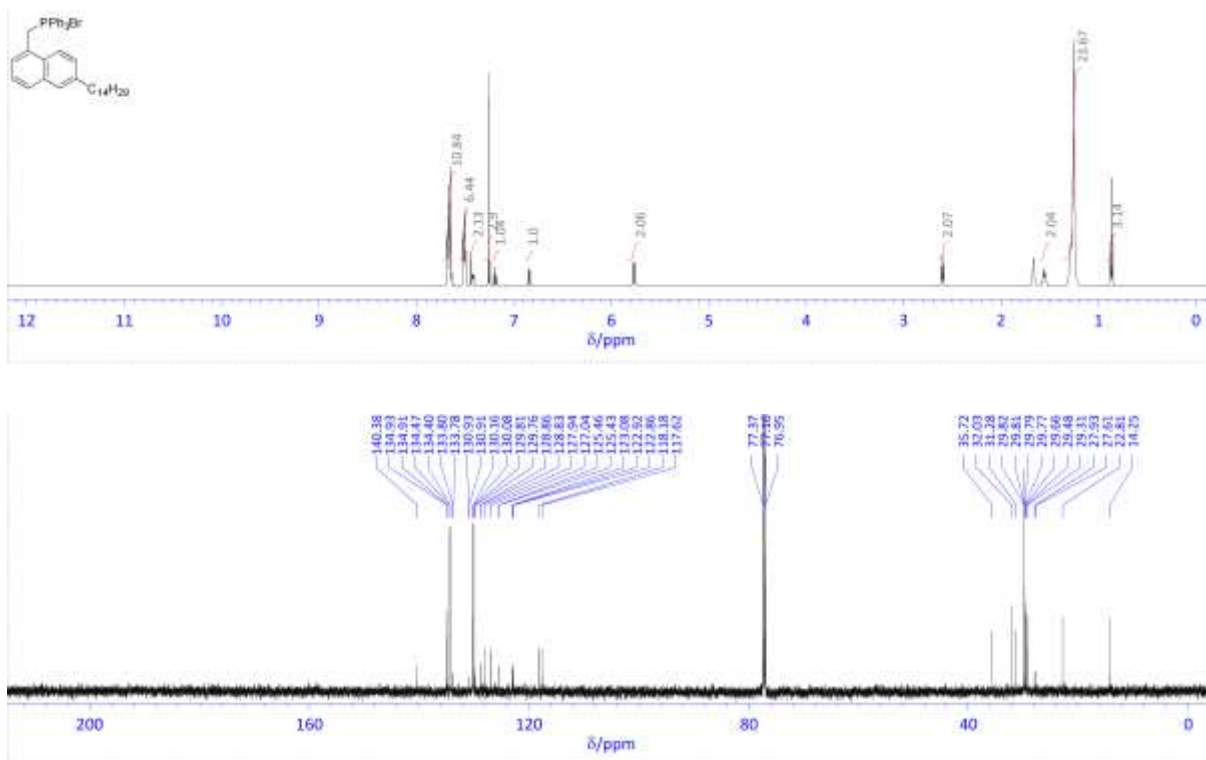

Figure S1-11.  $^1\text{H}$  (600 MHz) and  $^{13}\text{C}$  NMR (151 MHz) spectra of compound phosphonium salt **6b** (CDCl<sub>3</sub>).

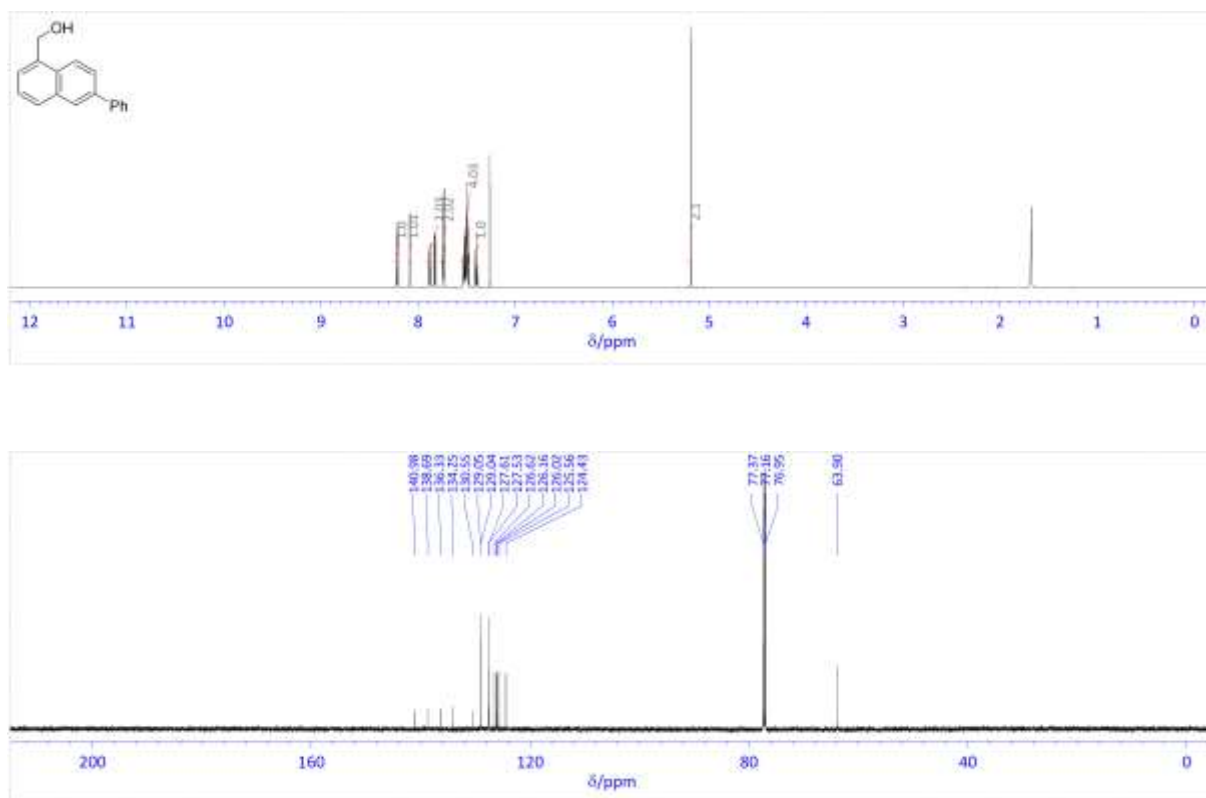

Figure S1-12.  $^1\text{H}$  (600 MHz) and  $^{13}\text{C}$  NMR (151 MHz) spectra of compound **7** (CDCl<sub>3</sub>).

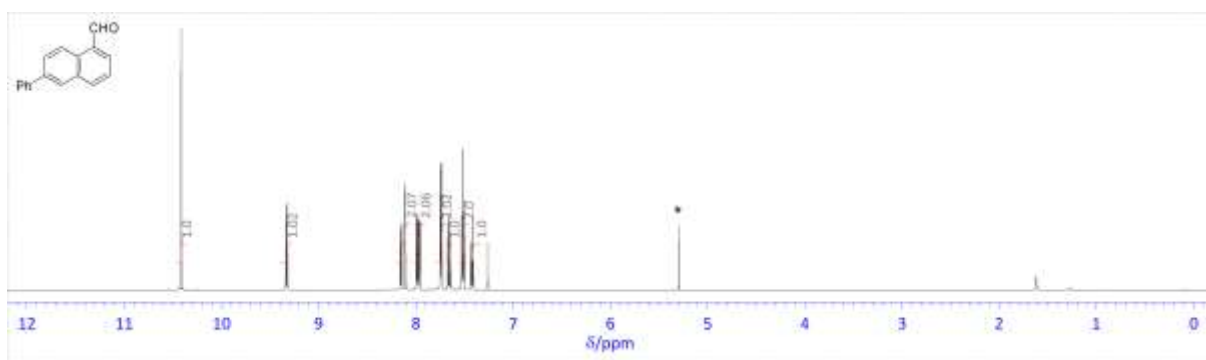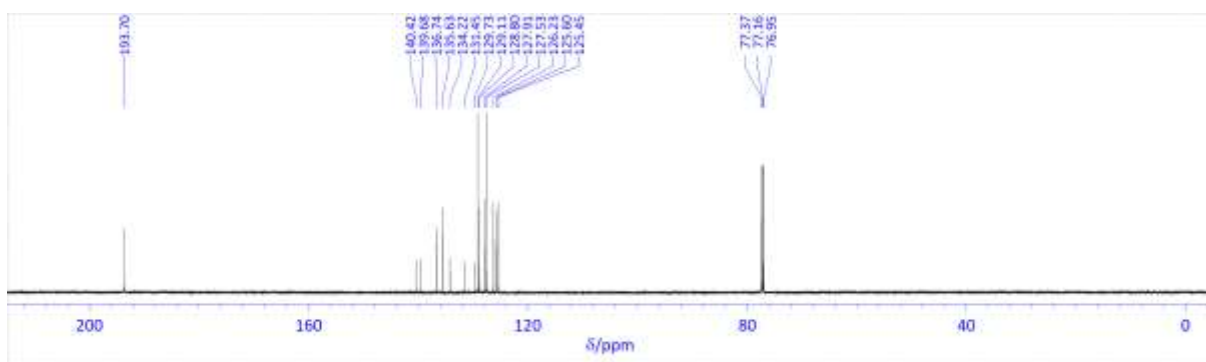

Figure S1-13.  $^1\text{H}$  (600 MHz) and  $^{13}\text{C}$  NMR (151 MHz) spectra of compound **8** ( $\text{CDCl}_3$ ).

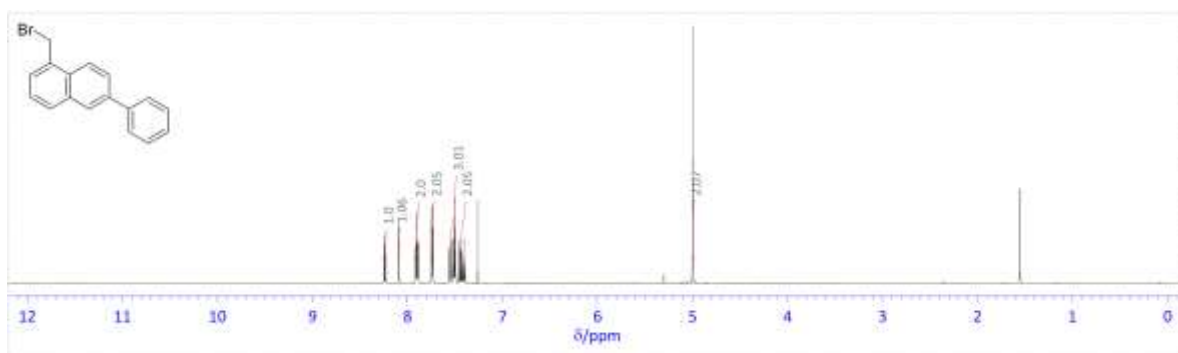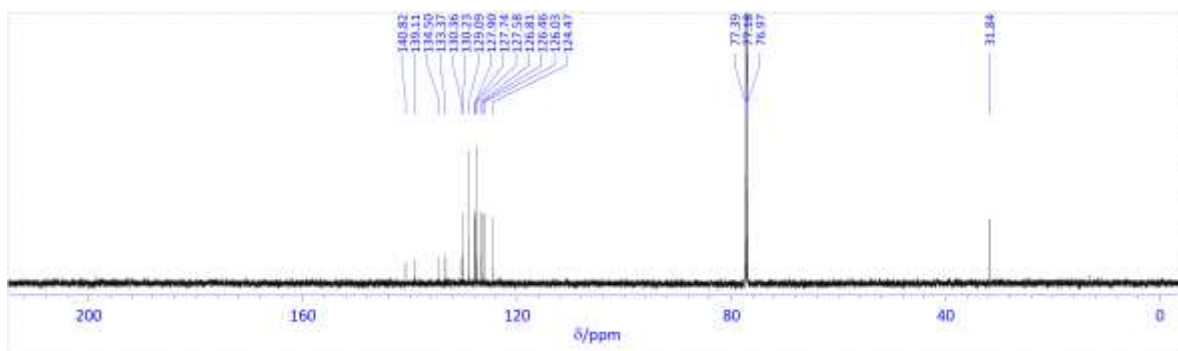

Figure S1-14.  $^1\text{H}$  (600 MHz) and  $^{13}\text{C}$  NMR (151 MHz) spectra of 1-bromomethyl-6-phenylnaphthalene ( $\text{CDCl}_3$ ).

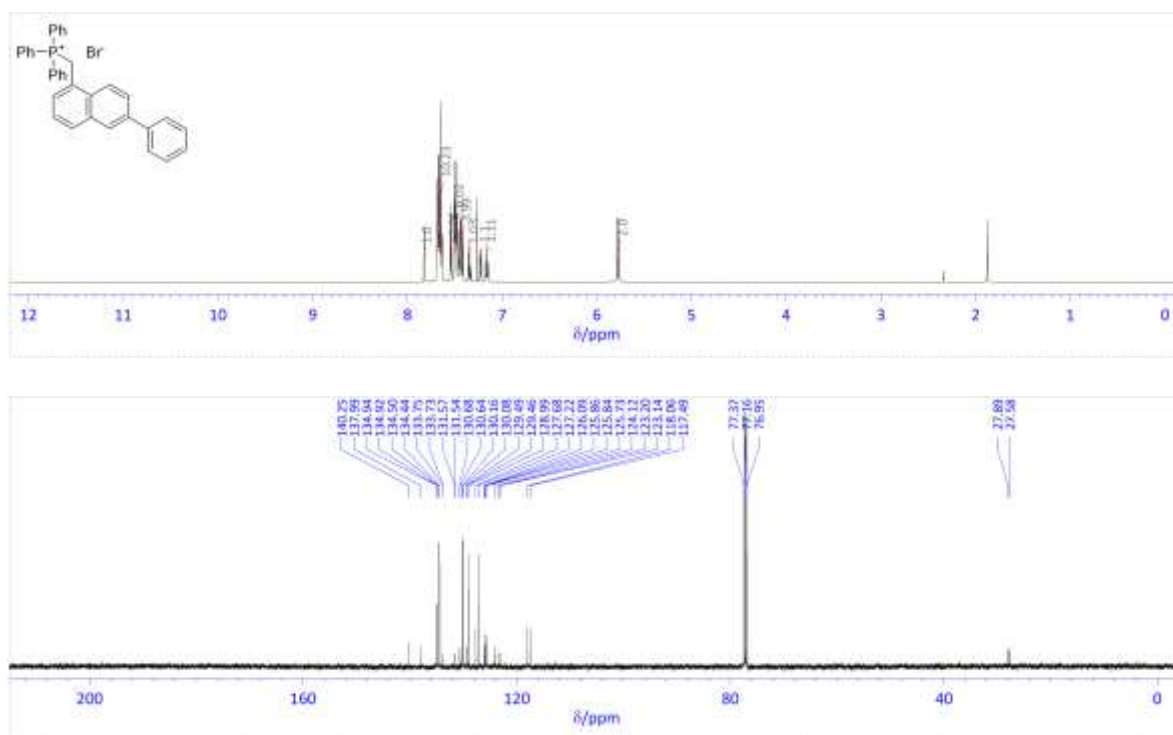

Figure S1-15.  $^1\text{H}$  (600 MHz) and  $^{13}\text{C}$  NMR (151 MHz) spectra of phosphonium salt **9** ( $\text{CDCl}_3$ ).

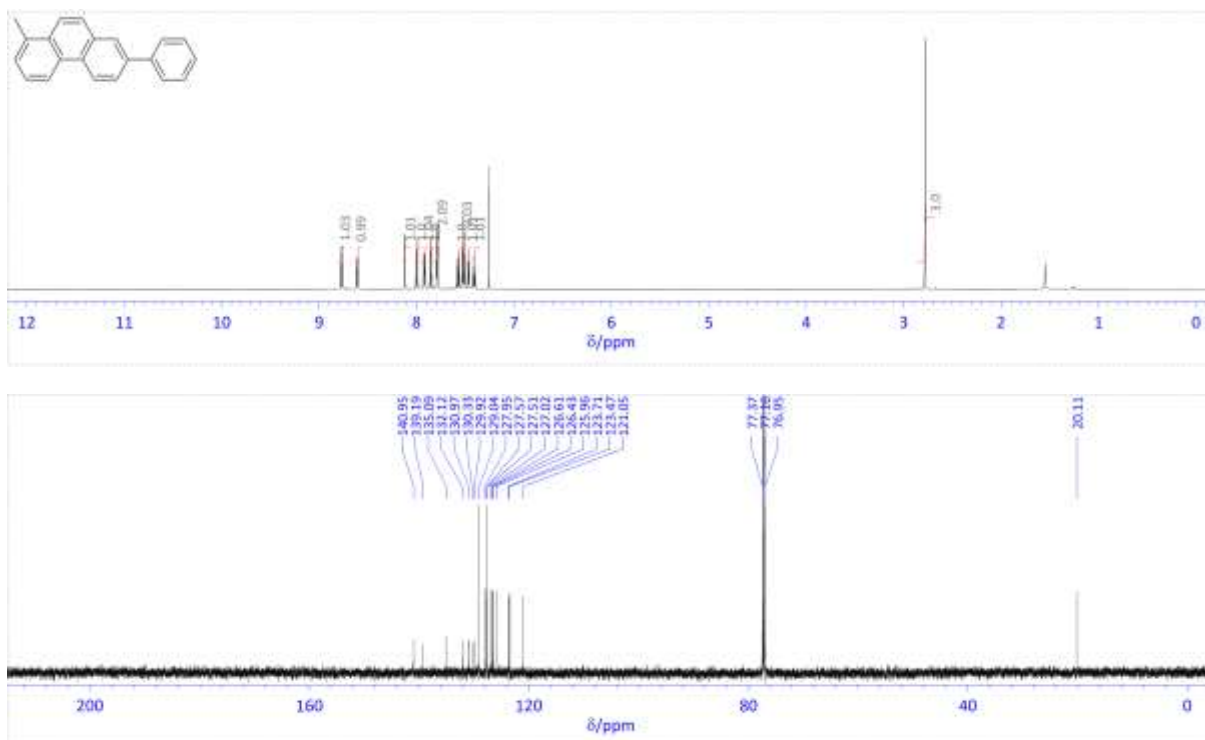

Figure S1-16.  $^1\text{H}$  (600 MHz) and  $^{13}\text{C}$  NMR (151 MHz) spectra of 1-methyl-7-phenylphenanthrene **12** ( $\text{CDCl}_3$ ).

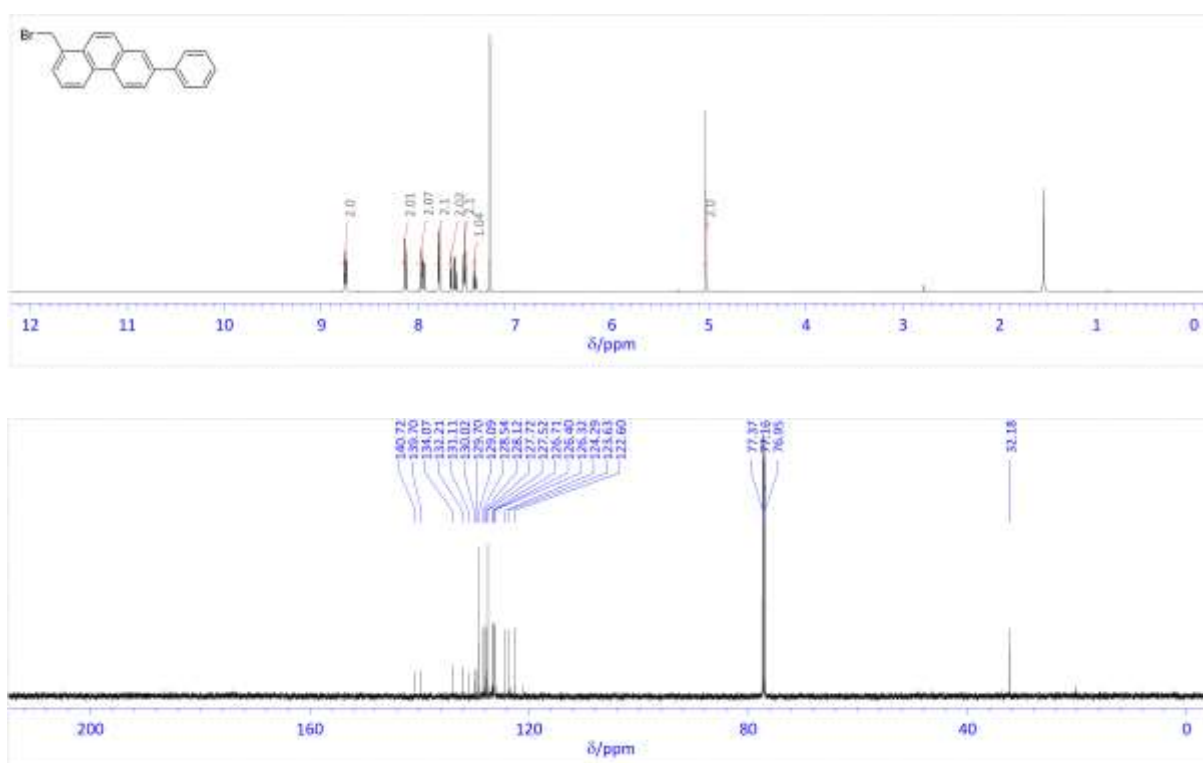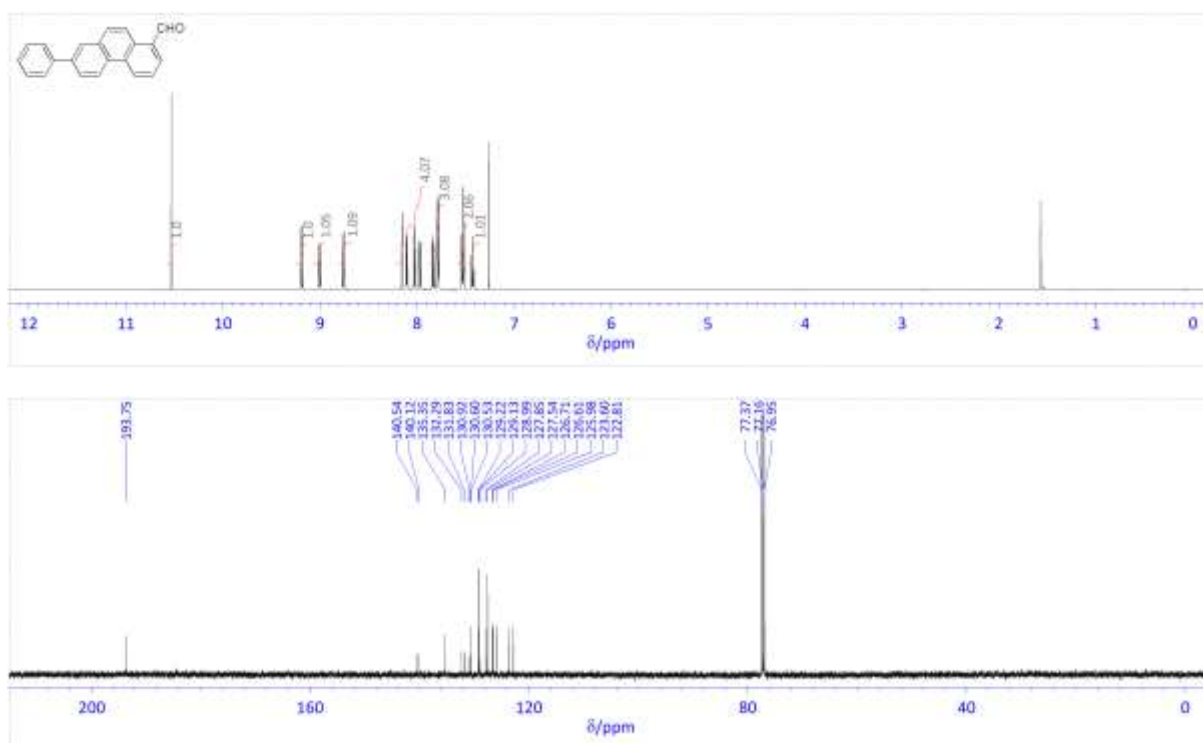

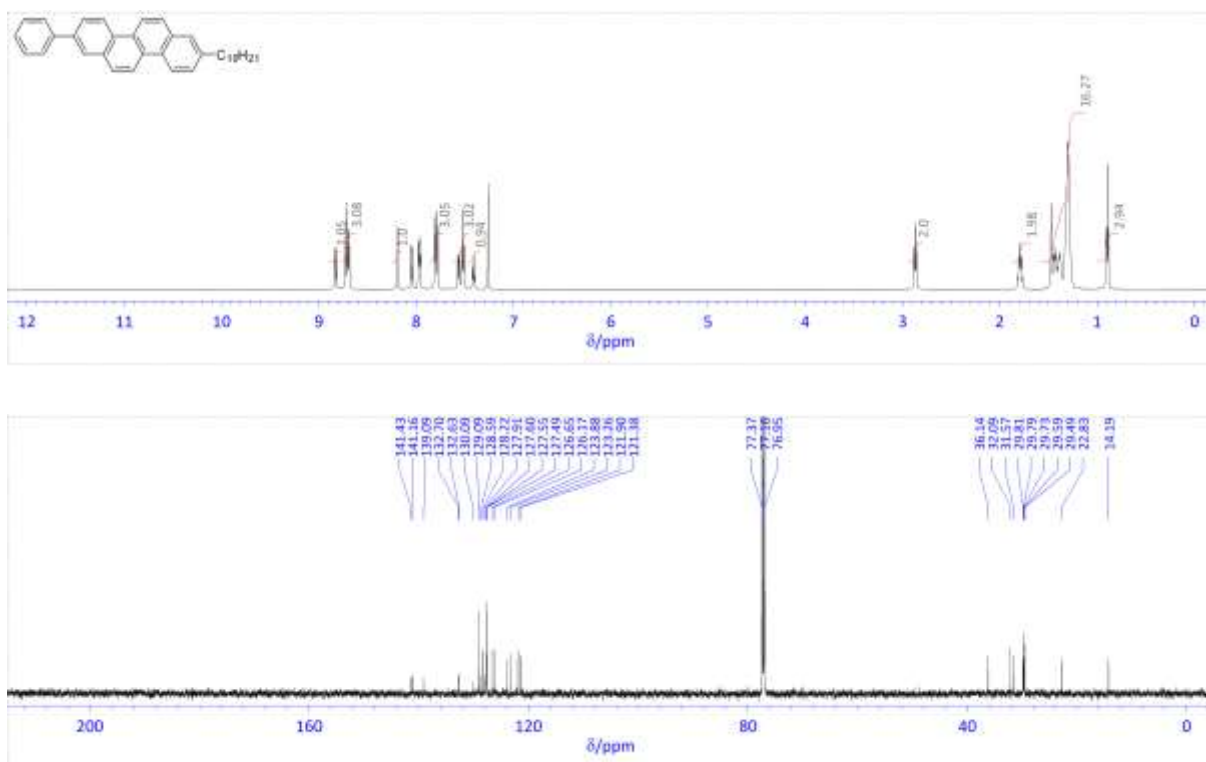

Figure S1-19.  $^1\text{H}$  (600 MHz) and  $^{13}\text{C}$  NMR (151 MHz) spectra of **PhC10-CHR** ( $\text{CDCl}_3$  at  $50^\circ\text{C}$ ).

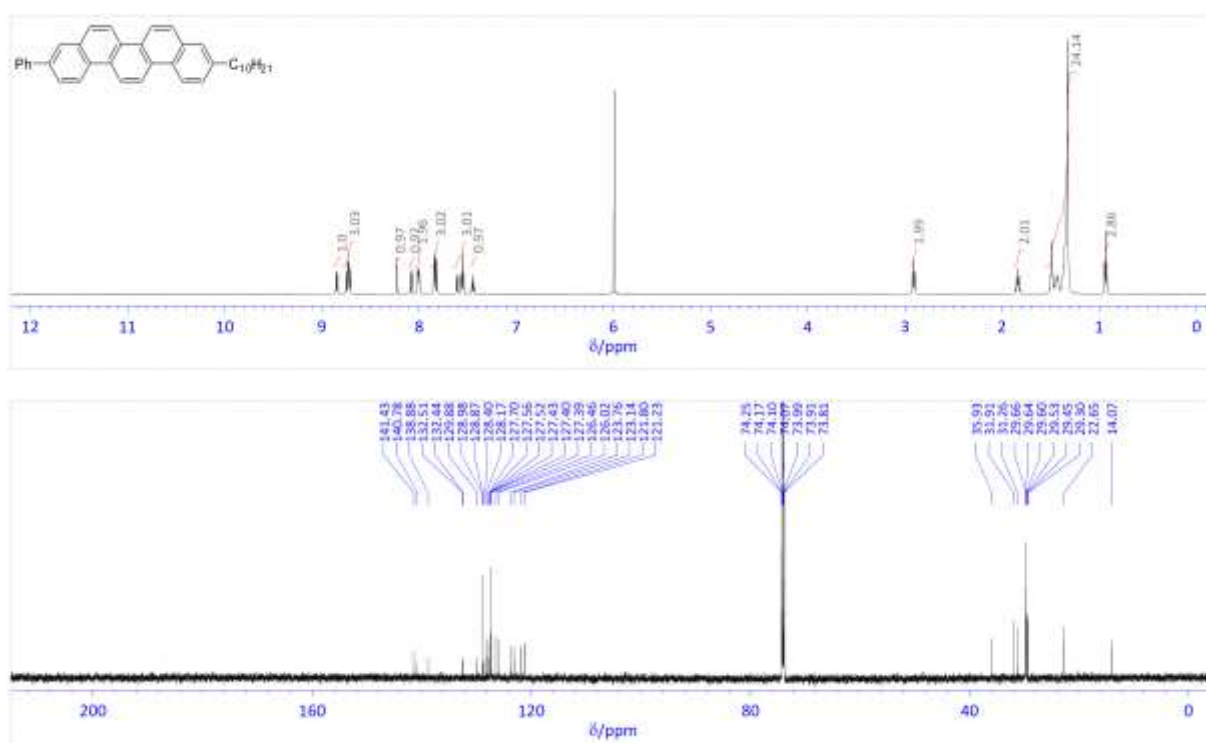

Figure S1-20.  $^1\text{H}$  (600 MHz) and  $^{13}\text{C}$  NMR (151 MHz) spectra of **PhC14-CHR** ( $1,1,2,2\text{-tetrachloroethane-d}_2$  at  $85^\circ\text{C}$ ).



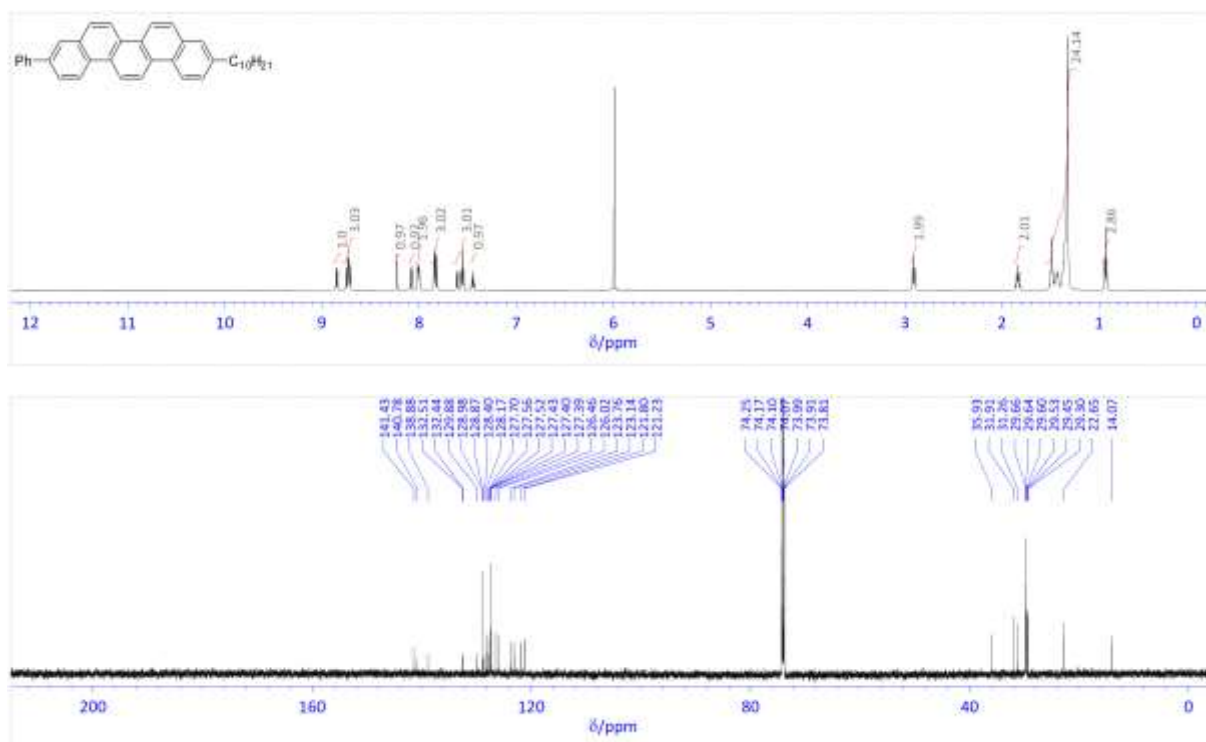

Figure S1-21.  $^1\text{H}$  (600 MHz) and  $^{13}\text{C}$  NMR (151 MHz) spectra of **PhC10-CHR** (1,1,2,2-tetrachloroethane- $\text{d}_2$ , at 100°C).

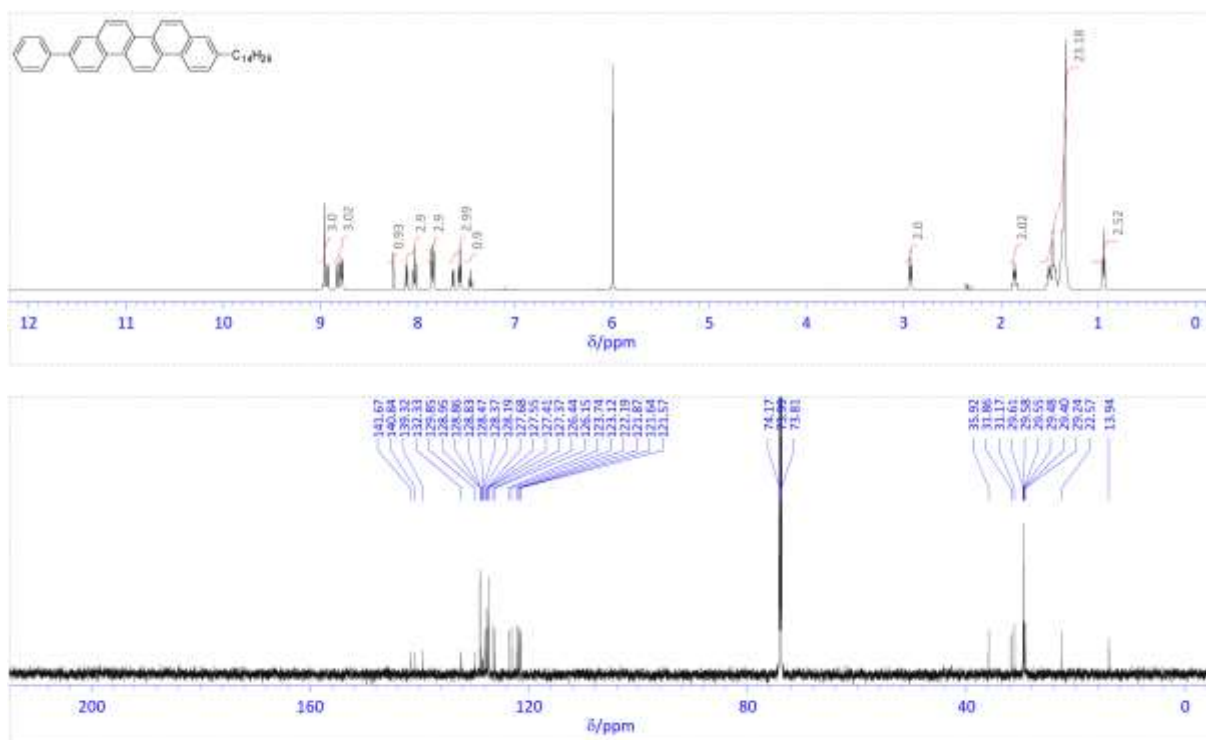

Figure S1-22.  $^1\text{H}$  (600 MHz) and  $^{13}\text{C}$  NMR (151 MHz) spectra of **PhC14-PIC** (1,1,2,2-tetrachloroethane- $\text{d}_2$ , at 100°C).

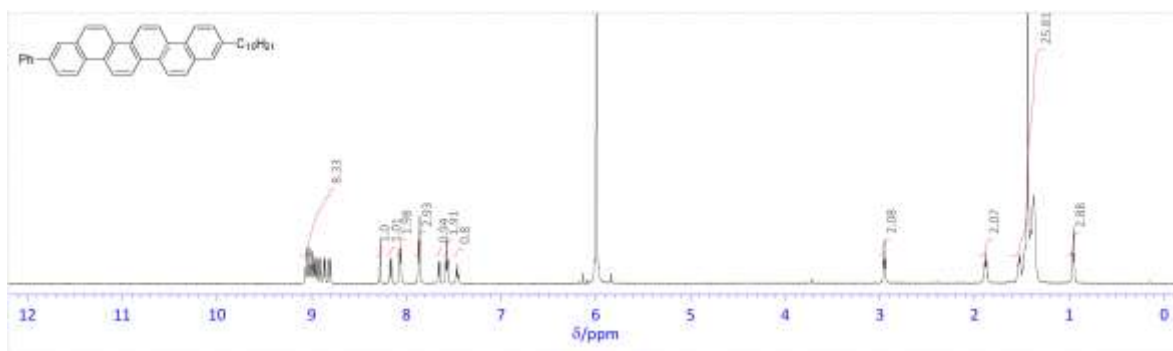

Figure S1-23.  $^1\text{H}$  (600 MHz) spectrum of **PhC10-FUL** (1,1,2,2-tetrachloroethane- $\text{d}_2$ , at  $100^\circ\text{C}$ ).

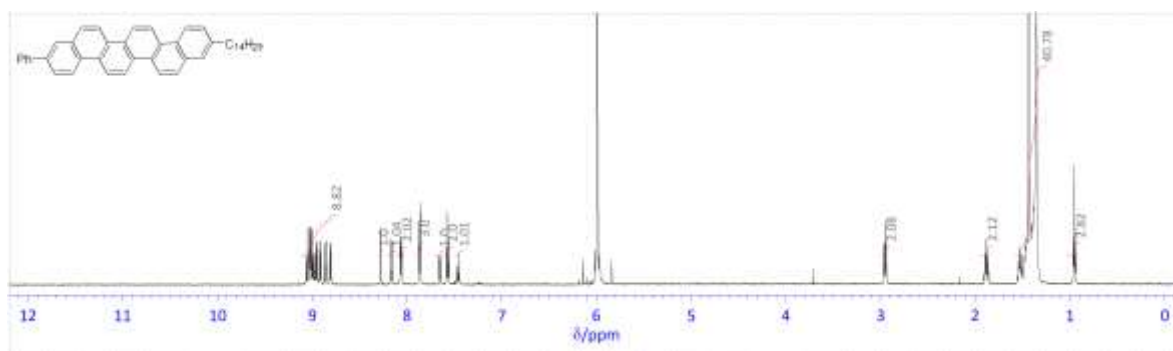

Figure S1-24.  $^1\text{H}$  (600 MHz) spectrum of **PhC10-FUL** (1,1,2,2-tetrachloroethane- $\text{d}_2$ , at  $100^\circ\text{C}$ ).

(3) UV-Vis absorption and fluorescence spectra of PhCn'-[n]phenacenes in solution (in *o*-dichlorobenzene) and solid phases (Figure S2) .

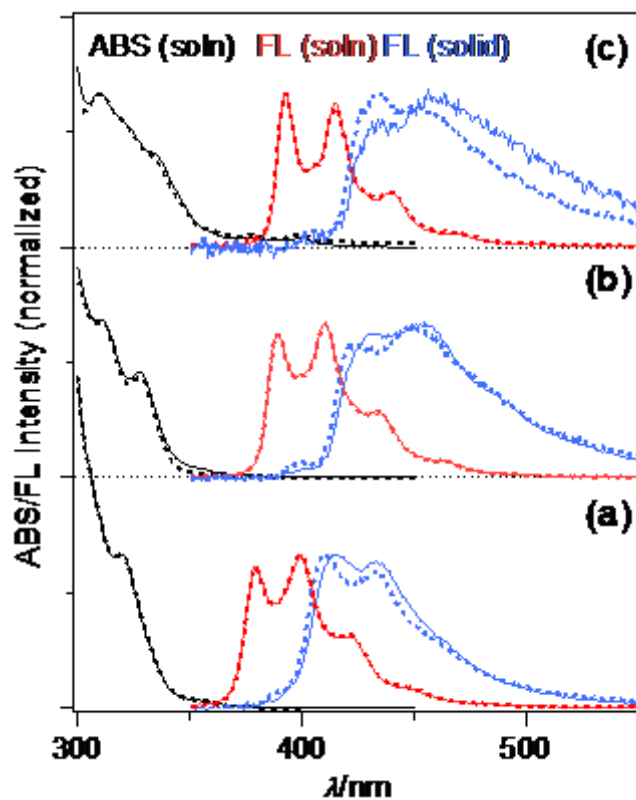

Figure S2. Absorption (in solution, black), fluorescence (in solution, red), and fluorescence (in solid, blue) spectra of (a) PhCn'-CHR, (b) PhCn'-PIC, and (c) PhCn'-FUL. Full lines are for  $n' = 10$  and dotted lines are for  $n' = 14$ . The absorption and fluorescence spectra in solution were measured in *o*-

(4) AFM images of thin films of PhC10-CHR, PhC14-CHR, PhC10-PIC, PhC14-PIC, PhC10-FUL and PhC14-FUL.

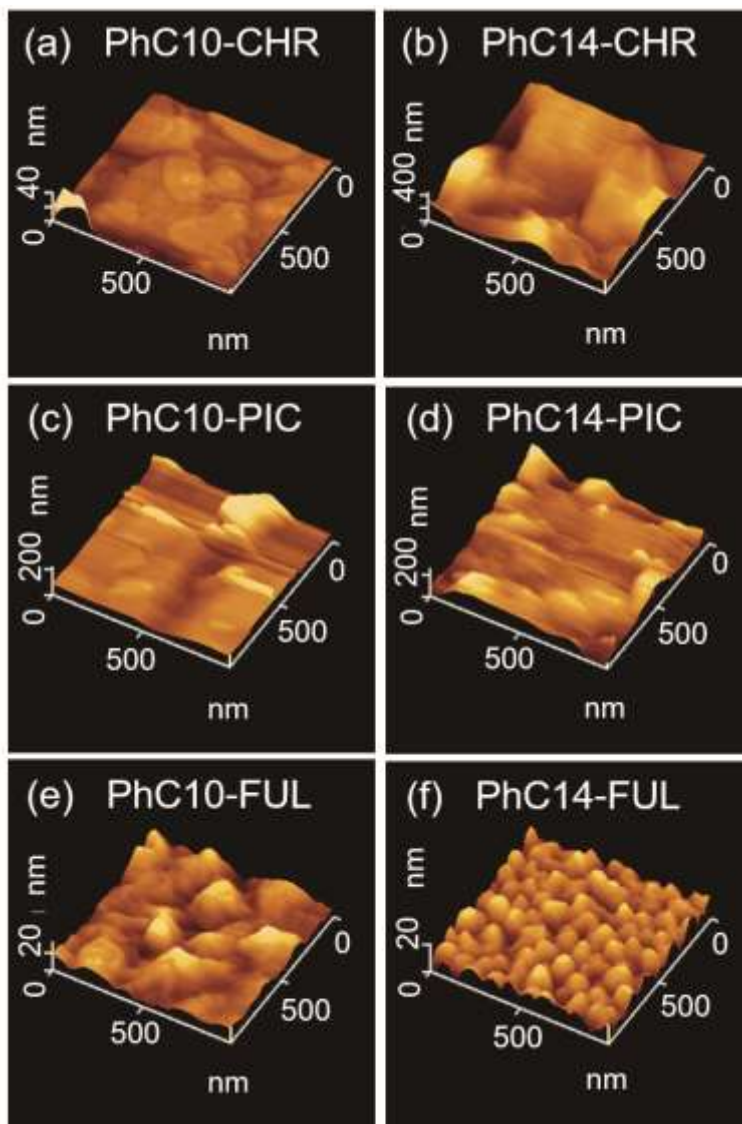

Figure S3. AFM images of thin films of (a) PhC10-CHR, (b) PhC14-CHR, (c) PhC10-PIC, (d) PhC14-PIC, (e) PhC10-FUL and (f) PhC14-FUL.

**(5) Transfer and output characteristics of PhC10-CHR, PhC14-CHR, PhC10-FUL and PhC14-FUL thin-film FETs with SiO<sub>2</sub> gate dielectric (Figures S4 and S5).**

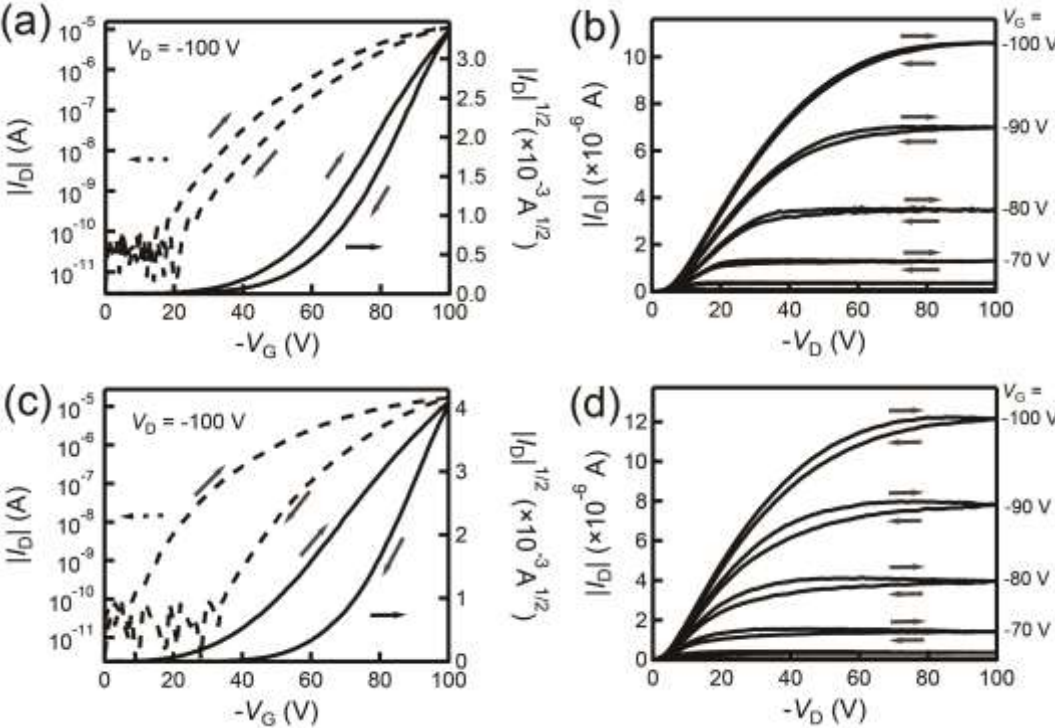

Figure S4. (a) Transfer and (b) output characteristics of FET with thin film of PhC10-CHR. (c) Transfer and (d) output characteristics of FET with thin film of PhC14-CHR. The thin films are formed on SiO<sub>2</sub>/Si substrate. The FETs of PhC10-CHR and PhC14-CHR refer to the devices which are marked with an asterisk (\*) in Table 4.

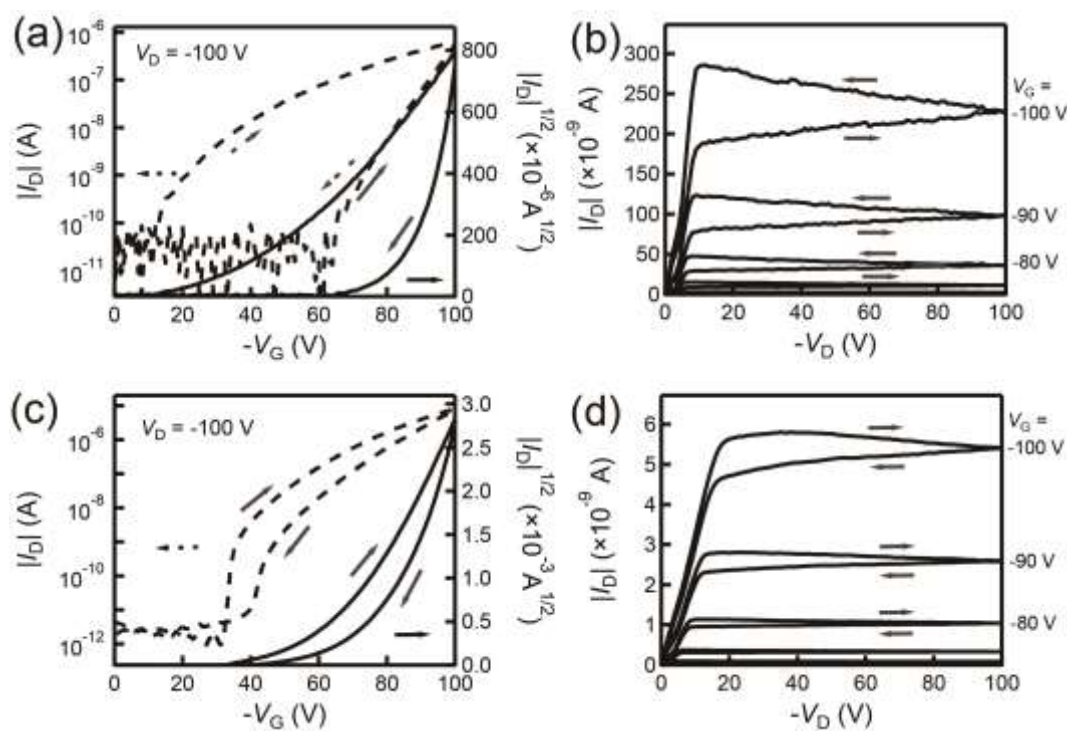

Figure S5. (a) Transfer and (b) output characteristics of FET with thin film of PhC10-FUL. (c) Transfer and (d) output characteristics of FET with thin film of PhC14-FUL. The thin films are formed on SiO<sub>2</sub>/Si substrate. The FETs of PhC10-FUL and PhC14-FUL refer to the devices which are marked with an asterisk (\*) in Table 5.

**(6) Transfer and output characteristics of PhC10-CHR, PhC14-CHR, PhC10-FUL and PhC14-FUL thin-film FETs with ZrO<sub>2</sub> gate dielectric (Figures S6 and S7).**

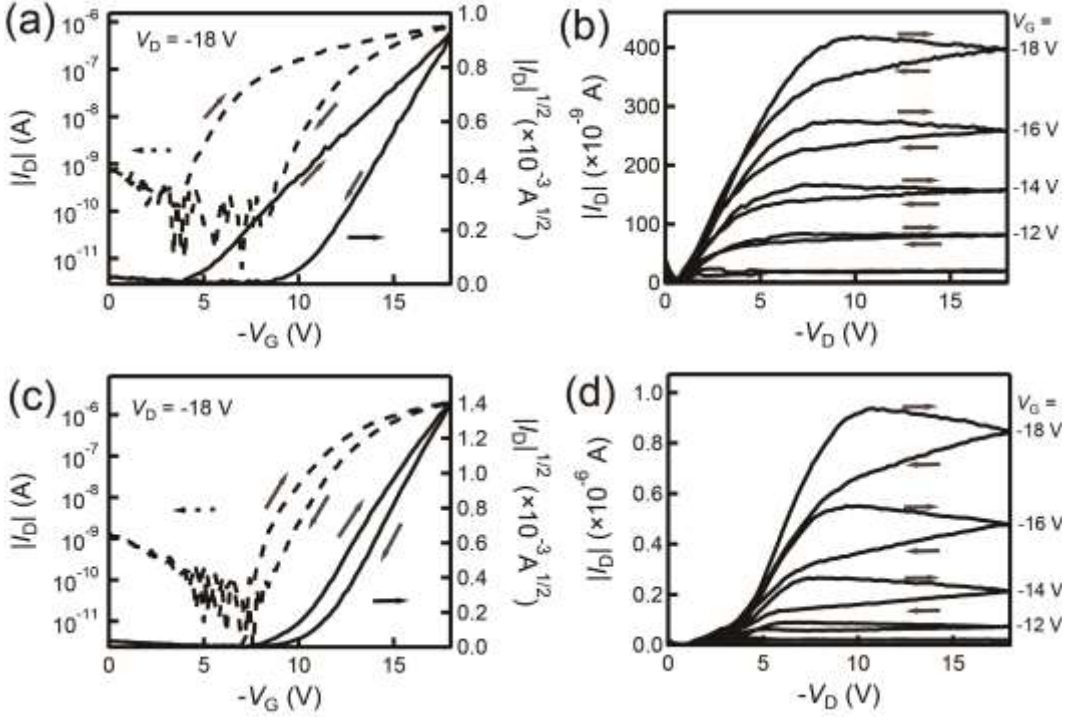

Figure S6. (a) Transfer and (b) output characteristics of FET with thin film of PhC10-CHR. (c) Transfer and (d) output characteristics of FET with thin film of PhC14-CHR. The thin films are formed on ZrO<sub>2</sub>/Si substrate. The FETs of PhC10-CHR and PhC14-CHR refer to the devices which are marked with an asterisk (\*) in Table 7.

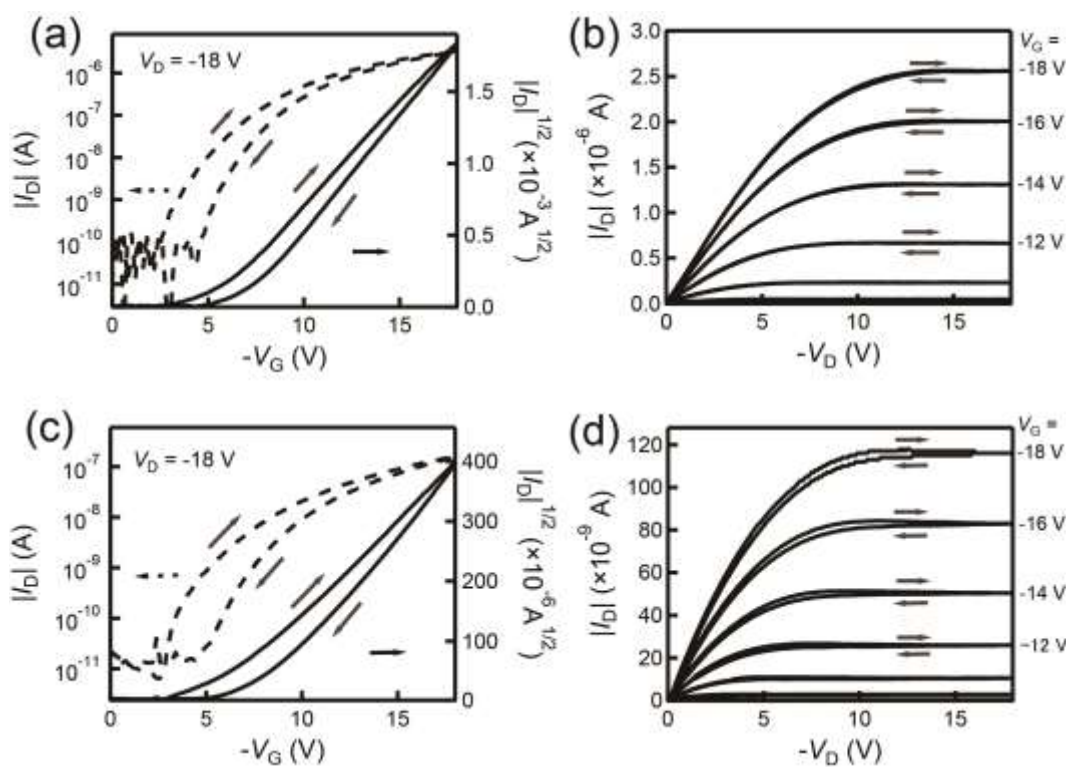

Figure S7. (a) Transfer and (b) output characteristics of FET with thin film of PhC10-FUL. (c) Transfer and (d) output characteristics of FET with thin film of PhC14-FUL. The thin films are formed on  $ZrO_2/Si$  substrate. The FETs of PhC10-FUL and PhC14-FUL refer to the devices which are marked with an asterisk (\*) in Table 8.
